# Supplementary material for: The effectiveness of exercise interventions to prevent sports injuries: a systematic review and meta-analysis of randomised controlled trials
Source: HighWire-hosted journal article supplement (doi:10.1136/bjsports-2013-092538), 2013-10-07
Supplement: bjsports-2013-092538supp.pdf [file bjsports-2013-092538supp.pdf]

## Online-only supplements

### eMethods1, Definition of sports injury

This article will define an injury as;

“Any physical complaint sustained by an individual that result from sports-related physical activity, irrespective of the need for medical attention or time loss from sports-related physical activities. An injury that results in an individual receiving medical attention is referred to as a “medical attention” injury, and an injury that results in an individual being unable to take a full part in sports-related activities as a “time loss” injury.”

This definition originates in the F-MARC consensus group concerning soccer injuries and has merely been fitted to the scope of this analysis.

### eMethods2, Complete searches

PubMed (Mesh terms are exploded): 1023 results, performed 3/10-2012, updated 7/1-2013

("prevention"[All Fields] OR "preventive"[All Fields] OR "decrease"[All Fields] OR "reduce"[All Fields] OR "reduction"[All Fields] OR "prophylaxis"[All Fields] OR "risk"[All Fields] OR "incidence"[All Fields] OR "prevention program"[All fields] OR "prevention and control"[Subheading] OR "primary prevention"[Mesh] OR "accident prevention"[Mesh] OR "risk management"[Mesh] OR "risk assessment"[Mesh] OR "risk reduction behavior"[Mesh] OR "program evaluation"[Mesh] OR "exercise therapy"[Mesh])

AND

("injury"[All Fields] OR "injuries"[All Fields] OR "accident?"[All Fields] OR "trauma"[All Fields] OR "cumulative trauma disorders"[Mesh] OR "soft tissue injuries"[Mesh] OR "sprains and strains"[Mesh] OR "tendons/pathology"[Mesh] OR "tendon injuries"[Mesh] OR "fractures, bone"[Mesh] OR "fractures, cartilage"[Mesh] OR "musculoskeletal system/injuries"[Mesh] OR "musculoskeletal system/pathology"[Mesh] OR "musculoskeletal system/physiopathology"[Mesh] OR "arm injuries"[Mesh] OR "hand injuries"[Mesh] OR "neck injuries"[Mesh] OR "back injuries"[Mesh] OR "hip injuries"[Mesh] OR "leg injuries"[Mesh] OR "sports medicine"[Mesh] OR "athletic injuries"[Mesh])

AND

("sport?"[All Fields] OR "athletic?"[All Fields] OR "exercise"[All Fields] OR "physical activity"[All Fields] OR "game"[All Fields] OR "recreation"[All Fields] OR "train"[All Fields] OR "training"[All Fields] OR "workout"[All Fields] OR "competition"[All Fields] OR "contest"[All Fields] OR "handball"[All Fields] OR "baseball"[Mesh] OR "basketball"[Mesh] OR "football"[Mesh] OR "soccer"[Mesh] OR "golf"[Mesh] OR "gymnastics"[Mesh] OR "hockey"[Mesh] OR "racquet sports"[Mesh] OR "running"[Mesh] OR "swimming"[Mesh] OR "volleyball"[Mesh] OR "athletic performance"[Mesh] OR "physical fitness"[Mesh] OR "motor activity"[Mesh] OR "exercise"[Mesh] OR "Motion"[Mesh] OR "Movement"[Mesh] OR "Exercise Movement Techniques"[Mesh])

AND

("randomized controlled trial"[All fields] OR RCT OR "randomized controlled trial"[Publication Type])

EMBASE (advanced search, searches limited to human, English language, and randomized controlled trial + multicenter studies): 1314 results, performed 3/10-2012, updated 7/1-2013

- Search 1      prevention or prevention/ or exp accident prevention/ or exp primary prevention/ or exp prevention study/ or decrease or reduce or reduction or risk or exp risk management/ or exp risk reduction/ or exp risk assessment/ or prophylaxis or exp prophylaxis/ or exp "primary prevention"/
- Search 2      injury or injuries or exp injury/ or exp accidental injury/ or exp musculoskeletal injury/ or exp soft tissue injury/ or exp sport injury/ or accident? or trauma or exp "cumulative trauma disorder"/ or exp "sports medicine"/
- Search 3      sport? or athletic? or exercise or "physical activity" or exp "physical activity"/ or train\* or workout or competition or train or exp sport/ or handball or exp team sport/ or exp exercise tolerance/ or exp exercise/ or exp "physical performance"/ or exp training/ or "motor activity"/
- Search 4      exp randomized controlled trial/ or RCT or "randomized controlled trial?"

Combine 1, 2, 3 and 4 with AND

Web of science (advanced search, English, articles, lemmatization on, combining sets with AND, and a sensitive scope of category refining): 728 results, performed 3/10-2012, updated 7/1-2013

- Set 1      TS=(prevention OR preventive OR decrease OR reduce OR reduction OR incidence OR "primary prevention" OR "accident prevention" OR "prevention study" OR prophylaxis OR "risk reduction" OR "risk management" OR "program evaluation")
- AND
- Set 2      TS=(injury OR injuries OR accident OR trauma OR strain OR sprain OR tendinopathy OR tendinosis OR "tendon injury" OR "overuse injury" OR fracture OR "bone injury" OR "cartilage injury" OR "cumulative trauma" OR muscle injury OR muscular injury OR myopathy OR "musculoskeletal injury" OR "soft tissue injuries" OR "cartilage injury" OR "sports medicine" OR "athletic injuries")
- AND
- Set 3      TS=(sport? OR athletic? OR exercise OR "physical activity" OR "motor activity" OR movement OR game OR recreation OR train OR training OR workout OR contest OR competition OR handball OR baseball OR basketball OR football OR soccer OR rugby OR golf OR gymnastics OR hockey OR "racquet sports" OR running OR swimming OR volleyball)
- AND
- Set 4      TS=(randomized controlled trial OR RCT)

Search refined by: Language = (English), Document Types =(Article)

Categories included: SPORT SCIENCES (299), ORTHOPEDICS (201), MEDICINE GENERAL INTERNAL (147), GERIATRICS GERONTOLOGY (94), GERONTOLOGY (65), RHEUMATOLOGY (59), MEDICINE RESEARCH EXPERIMENTAL (33), HEALTH CARE SCIENCES SERVICES (24), PRIMARY HEALTH CARE (21), WOMEN'S STUDIES (4), BEHAVIORAL SCIENCES (2), HOSPITALITY LEISURE SPORT TOURISM (2), TRANSPORTATION (2)

"SPORTSDiscus" (including "SPORTDiscus", "SPORTDiscus with full text" and "academic search complete", advanced search, applying related words, subject terms (SU) exploded when possible, and English): 397 results, performed 3/10-2012, updated 7/1-2013

Search 1      preventive OR prevention OR decrease OR inhibit OR avoid OR prophylaxis OR risk OR SU  
ACCIDENT prevention OR SU MEDICINE, Preventive OR SU risk

AND

Search 2      injury OR injuries OR accident? OR trauma OR musculoskeletal OR SU MUSCULOSKELETAL  
system -- Wounds & injuries OR SU SOFT tissue injuries OR SU OVERUSE injuries OR SU  
OVEREXERTION injuries OR SU RUPTURE of organs, tissues, etc. OR SU FRACTURES OR SU  
SPORTS injuries OR SU SPORTS physical therapy OR SU SPORTS accidents

AND

Search 3      sport? OR athletic? OR exercise OR physical activity OR train OR SU TRAINING OR SU PHYSICAL  
activity OR SU PHYSICAL training & conditioning OR SU ATHLETES OR SU ATHLETICS OR SU  
RECREATIONAL sports OR SU SPORTS OR SU SPORT for All OR SU SPORTS tournaments

AND

Search 4      randomized controlled trial OR RCT OR SU RANDOMIZED controlled trials

eFigure1, Study selection flowchart

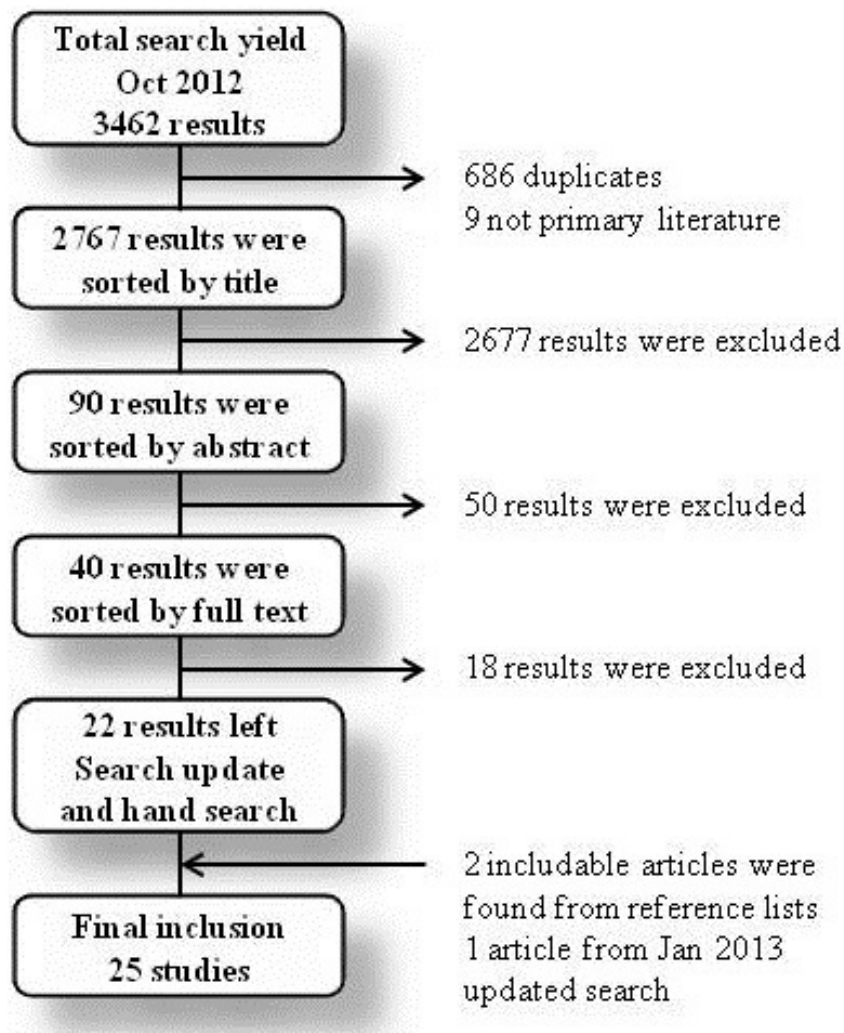

### eMethods3, Detailed study selection description

The above searches revealed 3462 results

3462 sorted for duplicates (if identical title and first author) and reference type

- 686 referenceduplicates (2776 left)
- 2 book sections, 1 case, 5 newspaper articles, and 1 blank reference (2767 left)

2767 sorted by title

- 2677 excluded

90 sorted by abstract

- 43 studies sorted by screening for exclusion criteria
- 2 studies had inappropriate control group  
(*“Buist, I., No effect of a graded training program on the number of running-related injuries in novice runners”/“Childs, J.D., Effects of Traditional Sit-up Training Versus Core Stabilization Exercises on Short-Term Musculoskeletal Injuries in US Army Soldiers: A Cluster Randomized Trial”*)
- 1 report duplicate  
(*“Canham-Chervak, M., Does stretching before exercise prevent lower-limb injury?”* same as *“Pope, R. P., A randomized trial of preexercise stretching for prevention of lower-limb injury”*)
- 1 study had prevalence as outcome  
(*“Cumps, E., Effect of a preventive intervention programme on the prevalence of anterior knee pain in volleyball players”*)
- 1 study included "healthy" participants regarded by the authors of this meta-analysis as having a "medical attention injury"  
  
(*“Fredberg, U., Prophylactic training in asymptomatic soccer players with ultrasonographic abnormalities in Achilles and patellar tendons - The Danish super league study”*)
- 1 study had information/safety equipment as intervention  
(*“Kendrick, D., Preventing injuries in children: cluster randomised controlled trial in primary care”*)
- 1 study was a review  
(*“O'Neill, T., Can we prevent fractures?”*)

40 sorted by full text

- 4 references were conference abstracts or course lectures  
(*"Emery C., The effectiveness of a combined sport injury and obesity prevention program in junior high school"*/*"Richmond S., Examining a sport injury and obesity intervention program in junior high school"*/*"Sinaki M., Stronger back muscles reduce the incidence of vertebral fractures: A prospective 10 year follow-up of postmenopausal women"*/*"Myklebust G., Prevention of noncontact anterior cruciate ligament injuries in elite and adolescent female team handball athletes"*)
- 3 references were study protocols  
(*"van Beijsterveldt A., Effectiveness and cost-effectiveness of an injury prevention programme for adult male amateur soccer players: design of a cluster-randomised controlled trial"*/*"Finch C. The Preventing Australian Football Injuries with Exercise (PAFIX) Study: a group randomised controlled trial"*/*"Bredeweg S., The GRONORUN 2 study: effectiveness of a preconditioning program on preventing running related injuries in novice runners. The design of a randomized controlled trial"*)
- 3 studies weren't randomized  
(*"Gatterer H., Effects of the performance level and the FIFA "11" injury prevention program on the injury rate in Italian male amateur soccer players"*/*"Kiani A., Prevention of Soccer-Related Knee Injuries in Teenaged Girls"*, *"Caraffa A., Prevention of anterior cruciate ligament injuries in soccer. A prospective controlled study of proprioceptive training"*)
- 2 study had control group defined as physical activity by this study  
(*"Bello M., Rhythmic stabilization versus conventional passive stretching to prevent injuries in indoor soccer athletes: A controlled clinical trial"*/*"Gabbe B., A pilot randomised controlled trial of eccentric exercise to prevent hamstring injuries in community-level Australian football"*)
- 2 studies with cluster randomization of 4 clusters and no adjustment for cluster effect were considered inadequate

(*"Parkkari J., Neuromuscular training with injury prevention counselling to decrease the risk of acute musculoskeletal injury in young men during military service: a population-based, randomised study"*/*"Verhagen E., Acute physical activity and sports injuries in children"*)

- 2 studies had physical activity intervention regarded insufficient for this analysis  
(*"Collard D., Effectiveness of a school-based physical activity injury prevention program: a cluster randomized controlled trial"*/*"van Mechelen W., Prevention of running injuries by warm-up, cool-down, and stretching exercises"*)
- 2 report duplicates

2 articles included from article references were added to 22 articles

- *"Askling C., Hamstring injury occurrence in elite soccer players after preseason strength training with eccentric overload"*
- *"Heidt R., Avoidance of soccer injuries with preseason conditioning"*

1 article included by the literature search update Jan 2013 was added to 24 articles

- *"van Beijsterveldt A., Effectiveness of an injury prevention programme for adult male amateur soccer players: a cluster-randomised controlled trial"*

25 articles for final inclusion

#### eMethods4, Quality assessments of included studies

Asklings et al., Hamstring injury occurrence in elite soccer players after preseason strength training with eccentric overload

|                                    |           |                                                                                                                                                                                                                                                               |
|------------------------------------|-----------|---------------------------------------------------------------------------------------------------------------------------------------------------------------------------------------------------------------------------------------------------------------|
| Random sequence generation         | Reported  | <i>"were randomly assigned to either"</i>                                                                                                                                                                                                                     |
|                                    | Judgement | <b>Low</b> risk of bias                                                                                                                                                                                                                                       |
| Allocation concealment             | Reported  | N/A                                                                                                                                                                                                                                                           |
|                                    | Judgement | <b>Unclear</b> risk of bias                                                                                                                                                                                                                                   |
| Blinding of participants/personnel | Reported  | <i>"Before the start of the study, the players, coaches and medical personnel of the two teams were informed about the purpose and the design of the study"</i>                                                                                               |
|                                    | Judgement | <b>High</b> risk of bias                                                                                                                                                                                                                                      |
| Blinding of outcome assessment     | Reported  | <i>"Before the start of the study, the players, coaches and medical personnel of the two teams were informed about the purpose and the design of the study"</i><br><br><i>"medical personnel of each team were not part of the study, thus avoiding bias"</i> |
|                                    | Judgement | <b>Low</b> risk of bias                                                                                                                                                                                                                                       |
| Incomplete outcome data            | Reported  | <i>Comment: No reported dropout or missing data</i>                                                                                                                                                                                                           |
|                                    | Judgement | <b>Low</b> risk of bias                                                                                                                                                                                                                                       |
| Selective reporting                | Reported  | <i>Comment: A clinical trials registry study protocol wasn't available but the published reports appear to include all expected outcomes, including those that were pre-specified in the method section of this article</i>                                   |
|                                    | Judgement | <b>Low</b> risk of bias                                                                                                                                                                                                                                       |
| Other bias                         | Reported  | <i>Comment: Intention-to-treat analysis performed</i><br><br><i>Comment: Possible contamination between study arms may underestimate intervention effect</i>                                                                                                  |
|                                    | Judgement | <b>Low</b> risk of bias                                                                                                                                                                                                                                       |

Beijsterveldt et al., Effectiveness of an injury prevention programme for adult male amateur soccer players: a cluster-randomised controlled trial

|                                    |           |                                                                                                                                                                                                                                                                                                                                                                              |
|------------------------------------|-----------|------------------------------------------------------------------------------------------------------------------------------------------------------------------------------------------------------------------------------------------------------------------------------------------------------------------------------------------------------------------------------|
| Random sequence generation         | Reported  | <i>Published study protocol reference: "Randomisation was done independently by drawing lots"</i>                                                                                                                                                                                                                                                                            |
|                                    | Judgement | <b>Low</b> risk of bias                                                                                                                                                                                                                                                                                                                                                      |
| Allocation concealment             | Reported  | N/A                                                                                                                                                                                                                                                                                                                                                                          |
|                                    | Judgement | <b>Unclear</b> risk of bias                                                                                                                                                                                                                                                                                                                                                  |
| Blinding of participants/personnel | Reported  | <i>Published study protocol reference: "The research team gave the clubs and their first team coaches information about the aims of the trial. The control group was asked to participate in a study on injury incidence and characteristics of practice sessions"</i>                                                                                                       |
|                                    | Judgement | <b>Low</b> risk of bias                                                                                                                                                                                                                                                                                                                                                      |
| Blinding of outcome assessment     | Reported  | N/A                                                                                                                                                                                                                                                                                                                                                                          |
|                                    | Judgement | <b>Unclear</b> risk of bias                                                                                                                                                                                                                                                                                                                                                  |
| Incomplete outcome data            | Reported  | <i>"Shortly after randomisation, the coach of one team from the intervention group refused to use The11 during the practice sessions"</i><br><br><i>Comment: The above should count as dropout as the team were randomized at this point. This means a dropout of 39 from the intervention group and 13 players from the control group according to the study flow chart</i> |
|                                    | Judgement | <b>High</b> risk of bias                                                                                                                                                                                                                                                                                                                                                     |
| Selective reporting                | Reported  | <i>Comment: A clinical trials registry study was available but the published article don't report the pre-specified Cox regression or any satisfactory measures of first-time injury</i>                                                                                                                                                                                     |
|                                    | Judgement | <b>High</b> risk of bias                                                                                                                                                                                                                                                                                                                                                     |

|            |           |                                                                                                                                                                                                             |
|------------|-----------|-------------------------------------------------------------------------------------------------------------------------------------------------------------------------------------------------------------|
| Other bias | Reported  | <i>Comment: Intention-to-treat analysis performed. Sample size calculations based in inflation factor estimate but no report of actual cluster adjustments in either study protocol or published report</i> |
|            | Judgement | <b>High</b> risk of bias                                                                                                                                                                                    |

Brushoj et al., Prevention of overuse injuries by a concurrent exercise program in subjects exposed to an increase in training load - A randomized controlled trial of 1020 army recruits

|                                    |           |                                                                                                                                                                                                                                                  |
|------------------------------------|-----------|--------------------------------------------------------------------------------------------------------------------------------------------------------------------------------------------------------------------------------------------------|
| Random sequence generation         | Reported  | <i>"The conscripts were randomly divided (by personal registration number) into 8 companies each consisting of 3 platoons"</i>                                                                                                                   |
|                                    | Judgement | <i>Comment: True cluster-randomization was achieved as personal registration numbers are randomly generated in Denmark</i><br><b>Low</b> risk of bias                                                                                            |
| Allocation concealment             | Reported  | <i>"randomization was performed by the head nurse, who otherwise did not participate in the study"</i>                                                                                                                                           |
|                                    | Judgement | <b>Low</b> risk of bias                                                                                                                                                                                                                          |
| Blinding of participants/personnel | Reported  | <i>"the recruits did not know which of the training programs was being tested"</i><br><br><i>"before their examination, the patients were informed by the head nurse not to reveal what exercise group they were allocated to"</i>               |
|                                    | Judgement | <b>Low</b> risk of bias                                                                                                                                                                                                                          |
| Blinding of outcome assessment     | Reported  | <i>"before their examination, the patients were informed by the head nurse not to reveal what exercise group they were allocated to"</i>                                                                                                         |
|                                    | Judgement | <b>Low</b> risk of bias                                                                                                                                                                                                                          |
| Incomplete outcome data            | Reported  | <i>"Attrition reasons not related to the present study"</i><br><br><i>Comment: Attrition of 20 and 23 in intervention and control group, respectively.</i>                                                                                       |
|                                    | Judgement | <b>Low</b> risk of bias                                                                                                                                                                                                                          |
| Selective reporting                | Reported  | <i>Comment: No clinical trials registry study protocol available and no pooled estimate for pre-specified primary outcomes</i>                                                                                                                   |
|                                    | Judgement | <b>High</b> risk of bias                                                                                                                                                                                                                         |
| Other bias                         | Reported  | <i>Comment: No intention-to-treat analysis or cluster adjustments</i><br><br><i>Comment: Concurrent training in high risk period may be detrimental for overuse injuries and may lead to an increased injury risk in the intervention group.</i> |
|                                    | Judgement | <b>High</b> risk of bias                                                                                                                                                                                                                         |

Coppack et al., The Effects of Exercise for the Prevention of Overuse Anterior Knee Pain A Randomized Controlled Trial

|                                    |           |                                                                                                                                                                                                                                                                                                   |
|------------------------------------|-----------|---------------------------------------------------------------------------------------------------------------------------------------------------------------------------------------------------------------------------------------------------------------------------------------------------|
| Random sequence generation         | Reported  | <i>"A simple randomization procedure based on a computer-generated table of random numbers"</i>                                                                                                                                                                                                   |
|                                    | Judgement | <b>Low</b> risk of bias                                                                                                                                                                                                                                                                           |
| Allocation concealment             | Reported  | <i>"An external administrator provided the group assignment"</i>                                                                                                                                                                                                                                  |
|                                    | Judgement | <b>Low</b> risk of bias                                                                                                                                                                                                                                                                           |
| Blinding of participants/personnel | Reported  | <i>"An attempt was made to blind participants, but given the physical nature of the intervention, we refrain from calling this a double-blinded study"</i><br><br><i>Comment: participant blinding attempt through the application of dummy warm- up exercises for control group participants</i> |
|                                    | Judgement | <b>Low</b> risk of bias                                                                                                                                                                                                                                                                           |
| Blinding of outcome assessment     | Reported  | <i>"Participants... were instructed not to reveal information about sessions to the AKP outcome assessor (physiotherapist)"</i>                                                                                                                                                                   |
|                                    | Judgement | <b>Low</b> risk of bias                                                                                                                                                                                                                                                                           |
| Incomplete                         | Reported  | <i>"Because of the military setting, no individuals were lost to follow-up"</i>                                                                                                                                                                                                                   |

|                     |           |                                                                                                                                                                                                                             |
|---------------------|-----------|-----------------------------------------------------------------------------------------------------------------------------------------------------------------------------------------------------------------------------|
| outcome data        |           | <i>"there was no evidence to suggest a difference in voluntary discharge rate between groups (<math>P&gt;0,05</math>)"</i>                                                                                                  |
|                     | Judgement | <b>Low</b> risk of bias                                                                                                                                                                                                     |
| Selective reporting | Reported  | <i>Comment: A clinical trials registry study protocol wasn't available but the published reports appear to include all expected outcomes, including those that were pre-specified in the method section of this article</i> |
|                     | Judgement | <b>Low</b> risk of bias                                                                                                                                                                                                     |
| Other bias          | Reported  | <i>Comment: Adjustment for clustering effect and intention-to-treat performed</i>                                                                                                                                           |
|                     | Judgement | <b>Low</b> risk of bias                                                                                                                                                                                                     |

Eils et al., Multistation proprioceptive exercise program prevents ankle injuries in basketball

|                                    |           |                                                                                                                                                                                                                             |
|------------------------------------|-----------|-----------------------------------------------------------------------------------------------------------------------------------------------------------------------------------------------------------------------------|
| Random sequence generation         | Reported  | <i>"198 subjects were randomly assigned to the control or the training group using a stratified randomization design, with the strata defined by performance (high, middle, or low) and sex"</i>                            |
|                                    | Judgement | <i>Comment: Performed by computer</i><br><b>Low</b> risk of bias                                                                                                                                                            |
| Allocation concealment             | Reported  | <i>Comment: No blinding</i>                                                                                                                                                                                                 |
|                                    | Judgement | <b>High</b> risk of bias                                                                                                                                                                                                    |
| Blinding of participants/personnel | Reported  | <i>Comment: Description of injury assessment and reporting indicate that blinding haven't been performed</i>                                                                                                                |
|                                    | Judgement | <b>High</b> risk of bias                                                                                                                                                                                                    |
| Blinding of outcome assessment     | Reported  | <i>Comment: Description of injury assessment and reporting indicate that blinding haven't been performed</i>                                                                                                                |
|                                    | Judgement | <b>High</b> risk of bias                                                                                                                                                                                                    |
| Incomplete outcome data            | Reported  | <i>Comment: Figure 1 shows 15 and 11 lost to follow-up for training and control, respectively. Attrition is fairly balanced between the two groups with similar reasons for missing data reported.</i>                      |
|                                    | Judgement | <b>Low</b> risk of bias                                                                                                                                                                                                     |
| Selective reporting                | Reported  | <i>Comment: A clinical trials registry study protocol wasn't available but the published reports appear to include all expected outcomes, including those that were pre-specified in the method section of this article</i> |
|                                    | Judgement | <b>Low</b> risk of bias                                                                                                                                                                                                     |
| Other bias                         | Reported  | <i>Comment: No mention of intention-to-treat or adjustment for clustering effects</i>                                                                                                                                       |
|                                    | Judgement | <b>High</b> risk of bias                                                                                                                                                                                                    |

Emery et al. 2005, Effectiveness of a home-based balance-training program in reducing sports-related injuries among healthy adolescents: a cluster randomized controlled trial

|                                    |           |                                                                                                                                                                                                                                                                                                         |
|------------------------------------|-----------|---------------------------------------------------------------------------------------------------------------------------------------------------------------------------------------------------------------------------------------------------------------------------------------------------------|
| Random sequence generation         | Reported  | <i>"Computer generated random numbers were used to recruit schools and students and to allocate the schools to the intervention or control group"</i>                                                                                                                                                   |
|                                    | Judgement | <b>Low</b> risk of bias                                                                                                                                                                                                                                                                                 |
| Allocation concealment             | Reported  | <i>"Computer generated random numbers"</i>                                                                                                                                                                                                                                                              |
|                                    | Judgement | <b>Low</b> risk of bias                                                                                                                                                                                                                                                                                 |
| Blinding of participants/personnel | Reported  | <i>"The study was blinded in that we randomly allocated schools to the intervention or control group following initial subject recruitment"</i>                                                                                                                                                         |
|                                    | Judgement | <i>Comment: This doesn't in itself ensure blinding but given the nature of interventions in most of the included studies in this paper an effort is considered to at least minimize the risk of bias in comparison to studies that provide full info to all participants</i><br><b>Low</b> risk of bias |
| Blinding of outcome assessment     | Reported  | N/A                                                                                                                                                                                                                                                                                                     |
|                                    | Judgement | <b>Unclear</b> risk of bias                                                                                                                                                                                                                                                                             |

|                         |           |                                                                                                                                                                                                                                                                                                            |
|-------------------------|-----------|------------------------------------------------------------------------------------------------------------------------------------------------------------------------------------------------------------------------------------------------------------------------------------------------------------|
| Incomplete outcome data | Reported  | <i>Comment: Participation flow chart states 6 and 7 exclusions from the intervention and control group, respectively. Exclusion reasons are stated and there are no indices that these shouldn't be balanced between groups or being of dissimilar reasons.</i>                                            |
|                         | Judgement | <b>Low</b> risk of bias                                                                                                                                                                                                                                                                                    |
| Selective reporting     | Reported  | <i>Comment: A clinical trials registry study protocol wasn't available but the published reports appear to include all expected outcomes, including those that were pre-specified in the method section of this article</i>                                                                                |
|                         | Judgement | <b>Low</b> risk of bias                                                                                                                                                                                                                                                                                    |
| Other bias              | Reported  | <i>Comment: Adjustment for clustering effects performed. Rate of collected data on compliance was low (43,3%) but as intention-to-treat analysis was performed this would lead to an underestimation of the effect of the intervention effect and the conclusions of this study therefore seems robust</i> |
|                         | Judgement | <b>Low</b> risk of bias                                                                                                                                                                                                                                                                                    |

Emery et al. 2010, The effectiveness of a neuromuscular prevention strategy to reduce injuries in youth soccer: a cluster-randomised controlled trial

|                                    |           |                                                                                                                                                                                                                                                                                                                                                                                                                         |
|------------------------------------|-----------|-------------------------------------------------------------------------------------------------------------------------------------------------------------------------------------------------------------------------------------------------------------------------------------------------------------------------------------------------------------------------------------------------------------------------|
| Random sequence generation         | Reported  | <i>"Teams were randomised by club"</i>                                                                                                                                                                                                                                                                                                                                                                                  |
|                                    | Judgement | <b>Low</b> risk of bias                                                                                                                                                                                                                                                                                                                                                                                                 |
| Allocation concealment             | Reported  | <i>"Randomisation was revealed following recruitment of teams to ensure allocation concealment"</i>                                                                                                                                                                                                                                                                                                                     |
|                                    | Judgement | <b>High</b> risk of bias                                                                                                                                                                                                                                                                                                                                                                                                |
| Blinding of participants/personnel | Reported  | <i>"Teams were blinded to the details of the other study-group programmes"</i><br><br><i>Comment: Control group did a standard warm-up which made it possible to blind participants</i>                                                                                                                                                                                                                                 |
|                                    | Judgement | <b>Low</b> risk of bias                                                                                                                                                                                                                                                                                                                                                                                                 |
| Blinding of outcome assessment     | Reported  | <i>"A study therapist (physiotherapist or athletic therapist) blinded to study group allocation was on site"</i>                                                                                                                                                                                                                                                                                                        |
|                                    | Judgement | <b>Low</b> risk of bias                                                                                                                                                                                                                                                                                                                                                                                                 |
| Incomplete outcome data            | Reported  | <i>Comment: Participant flow chart shows an attrition of 89 individuals in the training group and 52 from the control group. Team dropout after randomization was considered uneven</i>                                                                                                                                                                                                                                 |
|                                    | Judgement | <b>High</b> risk of bias                                                                                                                                                                                                                                                                                                                                                                                                |
| Selective reporting                | Reported  | <i>Comment: A clinical trials registry study protocol wasn't available but the published reports appear to include all expected outcomes, including those that were pre-specified in the method section of this article</i>                                                                                                                                                                                             |
|                                    | Judgement | <b>Low</b> risk of bias                                                                                                                                                                                                                                                                                                                                                                                                 |
| Other bias                         | Reported  | <i>Comment: Adjusted for clustering effects.</i><br><br><i>Comment: Rate of collected data on compliance was poor (&lt;15%) but as intention-to-treat analysis was performed this would lead to an underestimation of the effect of the intervention effect and the conclusions of this study therefore seems robust</i><br><br><i>Comment: Statistically significant difference in gender distribution at baseline</i> |
|                                    | Judgement | <b>Low</b> risk of bias                                                                                                                                                                                                                                                                                                                                                                                                 |

Emery et al. 2007, A prevention strategy to reduce the incidence of injury in high school basketball: a cluster randomized controlled trial

|                            |           |                                                                                        |
|----------------------------|-----------|----------------------------------------------------------------------------------------|
| Random sequence generation | Reported  | <i>"Random selection of schools was done by computer generation of random numbers"</i> |
|                            | Judgement | <b>Low</b> risk of bias                                                                |
| Allocation concealment     | Reported  | <i>"following subject recruitment to ensure allocation concealment"</i>                |
|                            | Judgement | <b>Unclear</b> risk of bias                                                            |

|                                    |           |                                                                                                                                                                                                                             |
|------------------------------------|-----------|-----------------------------------------------------------------------------------------------------------------------------------------------------------------------------------------------------------------------------|
| Blinding of participants/personnel | Reported  | <i>Comment: Subject blinding haven't been mentioned but design make true blinding possible</i>                                                                                                                              |
|                                    | Judgement | <b>Unclear</b> risk of bias                                                                                                                                                                                                 |
| Blinding of outcome assessment     | Reported  | <i>"The team therapist was blinded to training group allocation"</i>                                                                                                                                                        |
|                                    | Judgement | <b>Low</b> risk of bias                                                                                                                                                                                                     |
| Incomplete outcome data            | Reported  | <i>Comment: Participation flow chart report a dropout of one team (n = 11 subjects) from intervention group.</i>                                                                                                            |
|                                    | Judgement | <b>Low</b> risk of bias                                                                                                                                                                                                     |
| Selective reporting                | Reported  | <i>Comment: A clinical trials registry study protocol wasn't available but the published reports appear to include all expected outcomes, including those that were pre-specified in the method section of this article</i> |
|                                    | Judgement | <b>Low</b> risk of bias                                                                                                                                                                                                     |
| Other bias                         | Reported  | <i>Comment: Adjusted for clustering effects and analysed by intention-to-treat</i>                                                                                                                                          |
|                                    | Judgement | <b>Low</b> risk of bias                                                                                                                                                                                                     |

Gilchrist et al., A Randomized Controlled Trial to Prevent Non contact Anterior Cruciate Ligament Injury in Female Collegiate Soccer Players

|                                    |           |                                                                                                                                                                                                                                                                                                                   |
|------------------------------------|-----------|-------------------------------------------------------------------------------------------------------------------------------------------------------------------------------------------------------------------------------------------------------------------------------------------------------------------|
| Random sequence generation         | Reported  | <i>"Intervention and control teams were paired by proximity"</i><br><br><i>"Pairs were clustered geographically by region... and one pair from each region was selected randomly for observation"</i>                                                                                                             |
|                                    | Judgement | <b>Low</b> risk of bias                                                                                                                                                                                                                                                                                           |
| Allocation concealment             | Reported  | <i>"Participation and injury reports were submitted weekly by facsimile to study staff using codes for both teams and individual athletes for confidentiality"</i>                                                                                                                                                |
|                                    | Judgement | <b>Low</b> risk of bias                                                                                                                                                                                                                                                                                           |
| Blinding of participants/personnel | Reported  | <i>"Each team's ATC provided the athletes an overview of the study"</i>                                                                                                                                                                                                                                           |
|                                    | Judgement | <b>High</b> risk of bias                                                                                                                                                                                                                                                                                          |
| Blinding of outcome assessment     | Reported  | <i>"an ACL injury was counted only if the ATC reported confirmation by magnetic resonance imaging, arthroscopy, or direct visualization at the time of repair"</i><br><br><i>Comment: The above methods ensure a high level of objectiveness but, MR especially, can still contain a component of assessment.</i> |
|                                    | Judgement | <b>Low</b> risk of bias                                                                                                                                                                                                                                                                                           |
| Incomplete outcome data            | Reported  | <i>"Eight intervention teams were excluded from the analysis because they did not use the program 12 or more times"</i><br><br><i>Comment: Twelve teams dropped out after randomization from intervention group and two from control group</i>                                                                    |
|                                    | Judgement | <b>High</b> risk of bias                                                                                                                                                                                                                                                                                          |
| Selective reporting                | Reported  | <i>Comment: A clinical trials registry study protocol wasn't available but the published reports appear to include all expected outcomes, including those that were pre-specified in the method section of this article</i>                                                                                       |
|                                    | Judgement | <b>Low</b> risk of bias                                                                                                                                                                                                                                                                                           |
| Other bias                         | Reported  | <i>Comment: No intention-to-treat analysis or adjustment attempts for clustering effects</i>                                                                                                                                                                                                                      |
|                                    | Judgement | <b>High</b> risk of bias                                                                                                                                                                                                                                                                                          |

Heidt et al., Avoidance of soccer injuries with preseason conditioning

|                            |           |                                                                                                                                                        |
|----------------------------|-----------|--------------------------------------------------------------------------------------------------------------------------------------------------------|
| Random sequence generation | Reported  | <i>"Before the start of the select season, 42 of these players were randomly selected to participate in the Frapier Acceleration Training Program"</i> |
|                            | Judgement | <b>Low</b> risk of bias                                                                                                                                |
| Allocation                 | Reported  | N/A                                                                                                                                                    |

|                                    |           |                                                                                                                                                                                                                             |
|------------------------------------|-----------|-----------------------------------------------------------------------------------------------------------------------------------------------------------------------------------------------------------------------------|
| concealment                        | Judgement | <b>Unclear</b> risk of bias                                                                                                                                                                                                 |
| Blinding of participants/personnel | Reported  | <i>Comment: Customized athlete training makes blinding impossible</i>                                                                                                                                                       |
|                                    | Judgement | <b>High</b> risk of bias                                                                                                                                                                                                    |
| Blinding of outcome assessment     | Reported  | <i>"The athletic trainers were blinded as to which athletes participated in the preseason training program"</i>                                                                                                             |
|                                    | Judgement | <b>Low</b> risk of bias                                                                                                                                                                                                     |
| Incomplete outcome data            | Reported  | <i>Comment: All 300 participants was included in analysis</i>                                                                                                                                                               |
|                                    | Judgement | <b>Low</b> risk of bias                                                                                                                                                                                                     |
| Selective reporting                | Reported  | <i>Comment: A clinical trials registry study protocol wasn't available but the published reports appear to include all expected outcomes, including those that were pre-specified in the method section of this article</i> |
|                                    | Judgement | <b>Low</b> risk of bias                                                                                                                                                                                                     |
| Other bias                         | Reported  | <i>Comment: Intention-to-treat analysis were performed and no serious sources of bias were found</i>                                                                                                                        |
|                                    | Judgement | <b>Low</b> risk of bias                                                                                                                                                                                                     |

Holmich et al., Exercise program for prevention of groin pain in football players: a cluster-randomized trial

|                                    |           |                                                                                                                                                                                                                                                                     |
|------------------------------------|-----------|---------------------------------------------------------------------------------------------------------------------------------------------------------------------------------------------------------------------------------------------------------------------|
| Random sequence generation         | Reported  | <i>"randomized to the prevention group (PG) or the CG by block randomization (block size two). The randomization was computer generated"</i>                                                                                                                        |
|                                    | Judgement | <b>Low</b> risk of bias                                                                                                                                                                                                                                             |
| Allocation concealment             | Reported  | <i>"The individual physiotherapists and coaches were informed about the allocation of their club by a letter in a sealed and opaque envelope mailed by a secretary not involved in the analysis of the data"</i>                                                    |
|                                    | Judgement | <b>Low</b> risk of bias                                                                                                                                                                                                                                             |
| Blinding of participants/personnel | Reported  | <i>"Because of the nature of the intervention, blinding of the participants and observers (physiotherapist and coach) was not possible"</i><br><br><i>"The data manager, the statistician, and the authors were all blinded to the result of the randomization"</i> |
|                                    | Judgement | <b>Low</b> risk of bias                                                                                                                                                                                                                                             |
| Blinding of outcome assessment     | Reported  | <i>"Because of the nature of the intervention, blinding of the participants and observers (physiotherapist and coach) was not possible"</i>                                                                                                                         |
|                                    | Judgement | <b>High</b> risk of bias                                                                                                                                                                                                                                            |
| Incomplete outcome data            | Reported  | <i>"Because this ... was evenly distributed between the two allocations, we do not find this alarming from a trial quality point of view but very unfortunate from a sample size point of view."</i>                                                                |
|                                    | Judgement | <b>High</b> risk of bias                                                                                                                                                                                                                                            |
| Selective reporting                | Reported  | <i>Comment: No clinical trials registry study protocol available and results of the claimed intention-to-treat analysis wasn't reported</i>                                                                                                                         |
|                                    | Judgement | <b>High</b> risk of bias                                                                                                                                                                                                                                            |
| Other bias                         | Reported  | <i>Comment: Adjusted for intracluster correlation and intention-to-treat analysis was performed but was not reported</i><br><br><i>Comment: With 907 injuries in 977 individuals repeated injuries must have been included.</i>                                     |
|                                    | Judgement | <b>High</b> risk of bias                                                                                                                                                                                                                                            |

Jamtvedt et al., A pragmatic randomised trial of stretching before and after physical activity to prevent injury and soreness

|                                    |           |                                                                                                                                                                                                                             |
|------------------------------------|-----------|-----------------------------------------------------------------------------------------------------------------------------------------------------------------------------------------------------------------------------|
| Random sequence generation         | Reported  | <i>"The randomisation schedule was unrestricted (no stratification or blocking) and was administered by computer"</i>                                                                                                       |
|                                    | Judgement | <b>Low</b> risk of bias                                                                                                                                                                                                     |
| Allocation concealment             | Reported  | <i>"The allocation code was not broken until the analyses were compared and found to yield the same results"</i>                                                                                                            |
|                                    | Judgement | <b>Low</b> risk of bias                                                                                                                                                                                                     |
| Blinding of participants/personnel | Reported  | <i>Comment: No attempts to blind participants were described. The recruitment methods make it unlikely that participants have been blinded</i>                                                                              |
|                                    | Judgement | <b>High</b> risk of bias                                                                                                                                                                                                    |
| Blinding of outcome assessment     | Reported  | <i>"Participants who experienced an injury of the lower limb or back in the past week were asked to provide details about the injury."</i><br><br><i>Comment: No mention of injury-confirmation procedures</i>              |
|                                    | Judgement | <b>High</b> risk of bias                                                                                                                                                                                                    |
| Incomplete outcome data            | Reported  | <i>"Completeness of reporting was similar in the two groups"</i>                                                                                                                                                            |
|                                    | Judgement | <b>Low</b> risk of bias                                                                                                                                                                                                     |
| Selective reporting                | Reported  | <i>Comment: A clinical trials registry study protocol wasn't available but the published reports appear to include all expected outcomes, including those that were pre-specified in the method section of this article</i> |
|                                    | Judgement | <b>Low</b> risk of bias                                                                                                                                                                                                     |

|            |           |                                                                                                                                                                                                                                                                                           |
|------------|-----------|-------------------------------------------------------------------------------------------------------------------------------------------------------------------------------------------------------------------------------------------------------------------------------------------|
| Other bias | Reported  | <i>Comment: In the stretching group only 38,4% and 7,7%, respectively, complied fully or almost fully with target frequency and target duration. This could lead to an underestimation of the effect and may originate in the limitations on participant motivation over the internet</i> |
|            | Judgement | <b>High</b> risk of bias                                                                                                                                                                                                                                                                  |

LaBella et al., Effect of neuromuscular warm-up on injuries in female soccer and basketball athletes in urban public high schools: cluster randomized controlled trial

|                                    |           |                                                                                                                                                                                                                                                                                                                                                                                                                  |
|------------------------------------|-----------|------------------------------------------------------------------------------------------------------------------------------------------------------------------------------------------------------------------------------------------------------------------------------------------------------------------------------------------------------------------------------------------------------------------|
| Random sequence generation         | Reported  | <i>"The statistician generated the randomization sequence using an online random number generator program"</i><br><br><i>Comment: A minimization was conducted</i>                                                                                                                                                                                                                                               |
|                                    | Judgement | <b>Low</b> risk of bias                                                                                                                                                                                                                                                                                                                                                                                          |
| Allocation concealment             | Reported  | <i>"The research coordinator (J.G.) informed coaches of their allocation"</i>                                                                                                                                                                                                                                                                                                                                    |
|                                    | Judgement | <b>High</b> risk of bias                                                                                                                                                                                                                                                                                                                                                                                         |
| Blinding of participants/personnel | Reported  | <i>"The research coordinator (J.G.) informed coaches of their allocation"</i><br><br><i>"The research assistants (RAs) were not blinded to group assignments"</i><br><br><i>"We minimized this potential bias by objectively defining injury as one causing missed time from practice or game, and when a physician's diagnosis was unavailable, RA's consulted the principal investigator, who was blinded"</i> |
|                                    | Judgement | <b>High</b> risk of bias                                                                                                                                                                                                                                                                                                                                                                                         |
| Blinding of outcome assessment     | Reported  | <i>"The principal investigator and coinvestigators were blinded until data collection was complete"</i>                                                                                                                                                                                                                                                                                                          |
|                                    | Judgement | <b>Low</b> risk of bias                                                                                                                                                                                                                                                                                                                                                                                          |
| Incomplete outcome data            | Reported  | <i>"Drop-out rates were 6% for control coaches and 4% for intervention coaches"</i>                                                                                                                                                                                                                                                                                                                              |
|                                    | Judgement | <b>Low</b> risk of bias                                                                                                                                                                                                                                                                                                                                                                                          |
| Selective reporting                | Reported  | <i>Comment: A clinical trials registry study protocol wasn't available but the published reports lack a total estimate for primary outcome</i>                                                                                                                                                                                                                                                                   |
|                                    | Judgement | <b>High</b> risk of bias                                                                                                                                                                                                                                                                                                                                                                                         |
| Other bias                         | Reported  | <i>Comment: Intention-to-treat analysis was performed but adjustments for clustering effects wasn't accounted for on primary outcome</i>                                                                                                                                                                                                                                                                         |
|                                    | Judgement | <b>High</b> risk of bias                                                                                                                                                                                                                                                                                                                                                                                         |

Longo et al., The FIFA 11+ Program Is Effective in Preventing Injuries in Elite Male Basketball Players A Cluster Randomized Controlled Trial

|                                    |           |                                                                                                                                                                                                                             |
|------------------------------------|-----------|-----------------------------------------------------------------------------------------------------------------------------------------------------------------------------------------------------------------------------|
| Random sequence generation         | Reported  | <i>"Randomization was done independently by drawing lots"</i>                                                                                                                                                               |
|                                    | Judgement | <b>Low</b> risk of bias                                                                                                                                                                                                     |
| Allocation concealment             | Reported  | <i>"The statistician who conducted the randomization did not take part in the study"</i>                                                                                                                                    |
|                                    | Judgement | <b>Low</b> risk of bias                                                                                                                                                                                                     |
| Blinding of participants/personnel | Reported  | <i>"Another limitation of this study is that teams were not blinded to the exercise program"</i>                                                                                                                            |
|                                    | Judgement | <b>High</b> risk of bias                                                                                                                                                                                                    |
| Blinding of outcome assessment     | Reported  | <i>Comment: Team medical staff reported to blinded orthopaedic personnel</i>                                                                                                                                                |
|                                    | Judgement | <b>Low</b> risk of bias                                                                                                                                                                                                     |
| Incomplete outcome data            | Reported  | <i>Comment: Participants flow chart reveal 0 lost to final follow-up</i>                                                                                                                                                    |
|                                    | Judgement | <b>Low</b> risk of bias                                                                                                                                                                                                     |
| Selective reporting                | Reported  | <i>Comment: A clinical trials registry study protocol wasn't available but the published reports appear to include all expected outcomes, including those that were pre-specified in the method section of this article</i> |
|                                    | Judgement | <b>Low</b> risk of bias                                                                                                                                                                                                     |

|            |           |                                                                                          |
|------------|-----------|------------------------------------------------------------------------------------------|
| Other bias | Reported  | <i>Comment: Analyzed by intention-to-treat but no adjustments for clustering effects</i> |
|            | Judgement | <b>High</b> risk of bias                                                                 |

McGuine et al., The effect of a balance training program on the risk of ankle sprains in high school athletes

|                                    |           |                                                                                                                                                                                                                             |
|------------------------------------|-----------|-----------------------------------------------------------------------------------------------------------------------------------------------------------------------------------------------------------------------------|
| Random sequence generation         | Reported  | <i>"Randomization into intervention and controls was performed using groups of two based on a schedule provided by the statistician"</i>                                                                                    |
|                                    | Judgement | <b>Low</b> risk of bias                                                                                                                                                                                                     |
| Allocation concealment             | Reported  | <i>N/A</i>                                                                                                                                                                                                                  |
|                                    | Judgement | <b>Unclear</b> risk of bias                                                                                                                                                                                                 |
| Blinding of participants/personnel | Reported  | <i>"Subjects performing the intervention knew they were doing so to prevent ankle sprains"</i>                                                                                                                              |
|                                    | Judgement | <b>High</b> risk of bias                                                                                                                                                                                                    |
| Blinding of outcome assessment     | Reported  | <i>"the ATCs at the schools knew which teams were in the control and intervention groups"</i>                                                                                                                               |
|                                    | Judgement | <b>High</b> risk of bias                                                                                                                                                                                                    |
| Incomplete outcome data            | Reported  | <i>"(n = 11) of athletes dropped out of the study when they stopped participating on their interscholastic team and were included in the analysis through the last day of their team membership"</i>                        |
|                                    | Judgement | <b>Low</b> risk of bias                                                                                                                                                                                                     |
| Selective reporting                | Reported  | <i>Comment: A clinical trials registry study protocol wasn't available but the published reports appear to include all expected outcomes, including those that were pre-specified in the method section of this article</i> |
|                                    | Judgement | <b>Low</b> risk of bias                                                                                                                                                                                                     |
| Other bias                         | Reported  | <i>Comment: Intention-to-treat analysis performed but no adjustments for clustering effects</i>                                                                                                                             |
|                                    | Judgement | <b>High</b> risk of bias                                                                                                                                                                                                    |

Olsen et al., Exercises to prevent lower limb injuries in youth sports: cluster randomised controlled trial

|                                    |           |                                                                                                                                                                                                                                                                            |
|------------------------------------|-----------|----------------------------------------------------------------------------------------------------------------------------------------------------------------------------------------------------------------------------------------------------------------------------|
| Random sequence generation         | Reported  | <i>"block randomised these, with four clubs in each block to an intervention or control group"</i>                                                                                                                                                                         |
|                                    | Judgement | <b>Low</b> risk of bias                                                                                                                                                                                                                                                    |
| Allocation concealment             | Reported  | <i>"The statistician who conducted the randomisation was not involved in the intervention"</i><br><br><i>"Data on injury and exposure were reported by the physiotherapist using a web based database in which all the data were coded anonymously"</i>                    |
|                                    | Judgement | <b>Low</b> risk of bias                                                                                                                                                                                                                                                    |
| Blinding of participants/personnel | Reported  | <i>Comment: teams were informed of allocation</i>                                                                                                                                                                                                                          |
|                                    | Judgement | <b>High</b> risk of bias                                                                                                                                                                                                                                                   |
| Blinding of outcome assessment     | Reported  | <i>"Ten research physiotherapists who were blinded to group allocation recorded injuries in both groups"</i>                                                                                                                                                               |
|                                    | Judgement | <b>Low</b> risk of bias                                                                                                                                                                                                                                                    |
| Incomplete outcome data            | Reported  | <i>"Data on players who dropped out during the study period were included for the entire period of their participation"</i><br><br><i>Comment: Participants flow chart show 30 dropouts from intervention and 19 from control group and no difference in dropout rates</i> |
|                                    | Judgement | <b>Low</b> risk of bias                                                                                                                                                                                                                                                    |
| Selective reporting                | Reported  | <i>"We undertook all statistical analyses according to a pre-specified plan"</i><br><br><i>Comment: A clinical trials registry study protocol wasn't available</i>                                                                                                         |
|                                    | Judgement | <b>Low</b> risk of bias                                                                                                                                                                                                                                                    |
| Other bias                         | Reported  | <i>Comment: Well powered and design/analyses appears strong</i>                                                                                                                                                                                                            |
|                                    | Judgement | <b>Low</b> risk of bias                                                                                                                                                                                                                                                    |

Pasanen et al., Neuromuscular training and the risk of leg injuries in female floorball players: cluster randomised controlled study

|                                    |           |                                                                                                                                                             |
|------------------------------------|-----------|-------------------------------------------------------------------------------------------------------------------------------------------------------------|
| Random sequence generation         | Reported  | <i>"computer-generated randomisation"</i>                                                                                                                   |
|                                    | Judgement | <b>Low</b> risk of bias                                                                                                                                     |
| Allocation concealment             | Reported  | <i>"The statistician (MP) who carried out the computer-generated randomisation was not involved in the intervention"</i>                                    |
|                                    | Judgement | <b>Low</b> risk of bias                                                                                                                                     |
| Blinding of participants/personnel | Reported  | <i>"We informed the teams allocated to the intervention group about the upcoming training programme for preventing injuries"</i>                            |
|                                    | Judgement | <b>High</b> risk of bias                                                                                                                                    |
| Blinding of outcome assessment     | Reported  | <i>Comment: study doctor was "not involved in the intervention"</i>                                                                                         |
|                                    | Judgement | <b>Low</b> risk of bias                                                                                                                                     |
| Incomplete outcome data            | Reported  | <i>Comment: Participant flow chart showed 9 dropouts in each group, all were players with no contract</i>                                                   |
|                                    | Judgement | <b>Low</b> risk of bias                                                                                                                                     |
| Selective reporting                | Reported  | <i>Comment: Clinical trials registry study protocol was available and inclusion criteria, intervention, and outcomes corresponded to the reported study</i> |
|                                    | Judgement | <b>Low</b> risk of bias                                                                                                                                     |
| Other bias                         | Reported  | <i>Comment: Sufficiently powered and design/analyses appears strong with both intention-to-treat analysis and adjustments for clustering effects</i>        |
|                                    | Judgement | <b>Low</b> risk of bias                                                                                                                                     |

Petersen et al., Preventive effect of eccentric training on acute hamstring injuries in men's soccer: a cluster-randomized controlled trial

|                                    |           |                                                                                                                                                                                                                             |
|------------------------------------|-----------|-----------------------------------------------------------------------------------------------------------------------------------------------------------------------------------------------------------------------------|
| Random sequence generation         | Reported  | <i>"An independent research assistant did the randomization procedure by drawing a sealed, opaque envelope containing a team name followed by drawing another sealed, opaque envelope containing the allocation group"</i>  |
|                                    | Judgement | <b>Low</b> risk of bias                                                                                                                                                                                                     |
| Allocation concealment             | Reported  | <i>"An independent research assistant did the randomization procedure by drawing a sealed, opaque envelope containing a team name followed by drawing another sealed, opaque envelope containing the allocation group"</i>  |
|                                    | Judgement | <b>Low</b> risk of bias                                                                                                                                                                                                     |
| Blinding of participants/personnel | Reported  | <i>"the person responsible for the day-to-day running of the project, medical staff within the teams, and all players were aware of group allocation"</i>                                                                   |
|                                    | Judgement | <b>High</b> risk of bias                                                                                                                                                                                                    |
| Blinding of outcome assessment     | Reported  | <i>"Reasons for dropping out were transfer or stop of active career"</i>                                                                                                                                                    |
|                                    | Judgement | <b>Low</b> risk of bias                                                                                                                                                                                                     |
| Incomplete outcome data            | Reported  | <i>Comment: Dropout rates were 8% and 9% for intervention and control groups, respectively</i>                                                                                                                              |
|                                    | Judgement | <b>Low</b> risk of bias                                                                                                                                                                                                     |
| Selective reporting                | Reported  | <i>Comment: A clinical trials registry study protocol wasn't available but the published reports appear to include all expected outcomes, including those that were pre-specified in the method section of this article</i> |
|                                    | Judgement | <b>Low</b> risk of bias                                                                                                                                                                                                     |
| Other bias                         | Reported  | <i>Comment: Adjusted for clustering effects but no intention-to-treat analysis</i>                                                                                                                                          |
|                                    | Judgement | <b>Low</b> risk of bias                                                                                                                                                                                                     |

Pope et al. 1998, Effects of ankle dorsiflexion range and pre-exercise calf muscle stretching on injury risk in Army recruits

|                                    |           |                                                                                                                                                                                                                                      |
|------------------------------------|-----------|--------------------------------------------------------------------------------------------------------------------------------------------------------------------------------------------------------------------------------------|
| Random sequence generation         | Reported  | <i>"Recruits with surnames commencing with the same letter were equally split between the two platoons"</i>                                                                                                                          |
|                                    | Judgement | <i>"Pairs of platoons were then randomly allocated to control and stretch groups for this study"</i><br><b>Low risk of bias</b>                                                                                                      |
| Allocation concealment             | Reported  | N/A                                                                                                                                                                                                                                  |
|                                    | Judgement | <b>Unclear</b> risk of bias                                                                                                                                                                                                          |
| Blinding of participants/personnel | Reported  | <i>"They were not told which muscle group and injuries the researchers were investigating"</i><br><br><i>Comment: Control stretching of upper- limb muscles is likely the best possible way to achieve true blinding of subjects</i> |
|                                    | Judgement | <b>Low</b> risk of bias                                                                                                                                                                                                              |
| Blinding of outcome assessment     | Reported  | N/A                                                                                                                                                                                                                                  |
|                                    | Judgement | <b>Unclear</b> risk of bias                                                                                                                                                                                                          |
| Incomplete outcome data            | Reported  | <i>Comment: 98 from the intervention group and 112 from the control group were either discharged, backsquadded or withdrawn from the study</i>                                                                                       |
|                                    | Judgement | <b>Low</b> risk of bias                                                                                                                                                                                                              |
| Selective reporting                | Reported  | <i>Comment: A clinical trials registry study protocol wasn't available but the published reports appear to include all expected outcomes, including those that were pre-specified in the method section of this article</i>          |
|                                    | Judgement | <b>Low</b> risk of bias                                                                                                                                                                                                              |
| Other bias                         | Reported  | <i>Comment: No mention of either adjustment for clustering effects or intention-to-treat analysis</i>                                                                                                                                |
|                                    | Judgement | <b>High</b> risk of bias                                                                                                                                                                                                             |

Pope et al. 2000, A randomized trial of preexercise stretching for prevention of lower-limb injury

|                                    |           |                                                                                                                                                                                                                                                                                                                                        |
|------------------------------------|-----------|----------------------------------------------------------------------------------------------------------------------------------------------------------------------------------------------------------------------------------------------------------------------------------------------------------------------------------------|
| Random sequence generation         | Reported  | <i>"were allocated to stretch or control groups using a blocked, stratified, random allocation procedure"</i>                                                                                                                                                                                                                          |
|                                    | Judgement | <b>Low</b> risk of bias                                                                                                                                                                                                                                                                                                                |
| Allocation concealment             | Reported  | <i>"All allocation procedures to this point were conducted by administrative staff at Kapooka, without regard for the research to be conducted"</i>                                                                                                                                                                                    |
|                                    | Judgement | <b>Low</b> risk of bias                                                                                                                                                                                                                                                                                                                |
| Blinding of participants/personnel | Reported  | <i>Comment: Participants/personnel haven't likely been effectively blinded</i>                                                                                                                                                                                                                                                         |
|                                    | Judgement | <b>High</b> risk of bias                                                                                                                                                                                                                                                                                                               |
| Blinding of outcome assessment     | Reported  | <i>"The RMO, who was masked to patient allocation, categorized all injuries by area and type"</i>                                                                                                                                                                                                                                      |
|                                    | Judgement | <b>Low</b> risk of bias                                                                                                                                                                                                                                                                                                                |
| Incomplete outcome data            | Reported  | <i>"170 (11%; 69 from stretch group, and 101 from the control group) were discharged or transferred to officer training before the end of the training program and without suffering a lower- limb injury"</i><br><br><i>Comment: Survival analysis was conducted with subject results weighted by number of days of participation</i> |
|                                    | Judgement | <b>Low</b> risk of bias                                                                                                                                                                                                                                                                                                                |
| Selective reporting                | Reported  | <i>Comment: A clinical trials registry study protocol wasn't available but the published reports appear to include all expected outcomes, including those that were pre-specified in the method section of this article</i>                                                                                                            |

|            |           |                                                                                       |
|------------|-----------|---------------------------------------------------------------------------------------|
|            | Judgement | <b>Low</b> risk of bias                                                               |
| Other bias | Reported  | <i>Comment: Intention-to-treat analysis but no adjustments for clustering effects</i> |
|            | Judgement | <b>High</b> risk of bias                                                              |

Soderman et al., Balance board training: prevention of traumatic injuries of the lower extremities in female soccer players? A prospective randomized intervention study

|                                    |           |                                                                                                                                                                                                                                                                                            |
|------------------------------------|-----------|--------------------------------------------------------------------------------------------------------------------------------------------------------------------------------------------------------------------------------------------------------------------------------------------|
| Random sequence generation         | Reported  | <i>"Seven teams (n=121) were randomized to an intervention group and six teams (n=100) to a control group"</i>                                                                                                                                                                             |
|                                    | Judgement | <b>Low</b> risk of bias                                                                                                                                                                                                                                                                    |
| Allocation concealment             | Reported  | N/A                                                                                                                                                                                                                                                                                        |
|                                    | Judgement | <b>Unclear</b> risk of bias                                                                                                                                                                                                                                                                |
| Blinding of participants/personnel | Reported  | N/A                                                                                                                                                                                                                                                                                        |
|                                    | Judgement | <b>Unclear</b> risk of bias                                                                                                                                                                                                                                                                |
| Blinding of outcome assessment     | Reported  | N/A                                                                                                                                                                                                                                                                                        |
|                                    | Judgement | <b>Unclear</b> risk of bias                                                                                                                                                                                                                                                                |
| Incomplete outcome data            | Reported  | <i>"Drop-out in the intervention group (59/121) and control group (22/100)"</i>                                                                                                                                                                                                            |
|                                    | Judgement | <b>High</b> risk of bias                                                                                                                                                                                                                                                                   |
| Selective reporting                | Reported  | <i>Comment: A clinical trials registry study protocol wasn't available and the published reports do not report a total estimate for primary outcomes</i>                                                                                                                                   |
|                                    | Judgement | <b>High</b> risk of bias                                                                                                                                                                                                                                                                   |
| Other bias                         | Reported  | <i>Comment: Exclusion of 1/3 intervention group on the basis of compliance and not because of lack of data</i><br><br><i>Comment: Analysis of recurrent injuries</i><br><br><i>Comment: RR of 10.96 (2.10-57.3) regarding major injuries indicate that intervention may be detrimental</i> |
|                                    | Judgement | <b>High</b> risk of bias                                                                                                                                                                                                                                                                   |

Soligard et al., Comprehensive warm-up programme to prevent injuries in young female footballers: cluster randomised controlled trial

|                                    |           |                                                                                                                                                                                                                                                                                                            |
|------------------------------------|-----------|------------------------------------------------------------------------------------------------------------------------------------------------------------------------------------------------------------------------------------------------------------------------------------------------------------|
| Random sequence generation         | Reported  | <i>"We randomised"</i>                                                                                                                                                                                                                                                                                     |
|                                    | Judgement | <b>Low</b> risk of bias                                                                                                                                                                                                                                                                                    |
| Allocation concealment             | Reported  | <i>"The statistician (IH) who conducted the randomisation did not take part in the intervention"</i>                                                                                                                                                                                                       |
|                                    | Judgement | <b>Low</b> risk of bias                                                                                                                                                                                                                                                                                    |
| Blinding of participants/personnel | Reported  | <i>Comment: Both groups were informed of allocation</i>                                                                                                                                                                                                                                                    |
|                                    | Judgement | <b>High</b> risk of bias                                                                                                                                                                                                                                                                                   |
| Blinding of outcome assessment     | Reported  | <i>"At the research centre one physical therapist and one medical student, who were blinded to group allocation, recorded injuries"</i>                                                                                                                                                                    |
|                                    | Judgement | <b>Low</b> risk of bias                                                                                                                                                                                                                                                                                    |
| Incomplete outcome data            | Reported  | <i>"13 clubs in the intervention group did not start the warm-up programme nor did they deliver any data on injury or exposure"</i><br><br><i>"Nineteen clubs in the control group did not provide any data"</i><br><br><i>"The dropout rate was similar between the groups (23 (2,1%) vs. 24 (2,9%))"</i> |
|                                    | Judgement | <b>Low</b> risk of bias                                                                                                                                                                                                                                                                                    |
| Selective reporting                | Reported  | <i>Comment: A clinical trials registry study protocol wasn't available but the published reports appear to include all expected outcomes, including those that were pre-specified in the method section of this article</i>                                                                                |

|            |           |                                                                                       |
|------------|-----------|---------------------------------------------------------------------------------------|
|            | Judgement | <b>Low</b> risk of bias                                                               |
| Other bias | Reported  | <i>Comment: Adjusted by intraclass coefficient and analyzed by intention-to-treat</i> |
|            | Judgement | <b>Low</b> risk of bias                                                               |

Steffen et al., Preventing injuries in female youth football – a cluster-randomized controlled trial

|                                    |           |                                                                                                                                                                                                                                                         |
|------------------------------------|-----------|---------------------------------------------------------------------------------------------------------------------------------------------------------------------------------------------------------------------------------------------------------|
| Random sequence generation         | Reported  | <i>Comment: Stratified block randomization was described</i>                                                                                                                                                                                            |
|                                    | Judgement | <b>Low</b> risk of bias                                                                                                                                                                                                                                 |
| Allocation concealment             | Reported  | <i>"The statistician (IH) who conducted the randomisation did not take part in the intervention"</i>                                                                                                                                                    |
|                                    | Judgement | <b>Low</b> risk of bias                                                                                                                                                                                                                                 |
| Blinding of participants/personnel | Reported  | <i>Comment: Both groups were informed of allocation</i>                                                                                                                                                                                                 |
|                                    | Judgement | <b>High</b> risk of bias                                                                                                                                                                                                                                |
| Blinding of outcome assessment     | Reported  | <i>"The injury recorders were blinded to which group the teams and injured players belonged to"</i>                                                                                                                                                     |
|                                    | Judgement | <b>Low</b> risk of bias                                                                                                                                                                                                                                 |
| Incomplete outcome data            | Reported  | <i>Comment: 18 and 54 players dropped out from the intervention and control group, respectively. The reports on attrition is ambiguous</i>                                                                                                              |
|                                    | Judgement | <b>Low</b> risk of bias                                                                                                                                                                                                                                 |
| Selective reporting                | Reported  | <i>Comment: A clinical trials registry study protocol wasn't available but the published reports appear to include all expected outcomes, including those that were pre-specified in the method section of this article</i>                             |
|                                    | Judgement | <b>Low</b> risk of bias                                                                                                                                                                                                                                 |
| Other bias                         | Reported  | <i>"The program was used at 52% of all trainings for the intervention group and the average attendance for these were 60% for each player"</i><br><br><i>Comment: Both intention-to-treat analysis and clustering effect adjustments were performed</i> |
|                                    | Judgement | <b>Low</b> risk of bias                                                                                                                                                                                                                                 |

Waldén et al., Prevention of acute knee injuries in adolescent female football players: cluster randomised controlled trial

|                                    |           |                                                                                                                                                                              |
|------------------------------------|-----------|------------------------------------------------------------------------------------------------------------------------------------------------------------------------------|
| Random sequence generation         | Reported  | <i>"We used a computer generated list of random numbers to randomise clubs stratified by district, whereby all teams from the same club were assigned to the same group"</i> |
|                                    | Judgement | <b>Low</b> risk of bias                                                                                                                                                      |
| Allocation concealment             | Reported  | <i>"One author (IA) who was blinded to the identity of the clubs did the randomisation"</i>                                                                                  |
|                                    | Judgement | <b>Low</b> risk of bias                                                                                                                                                      |
| Blinding of participants/personnel | Reported  | <i>"The coaches, players, and study therapists were not blinded to group allocation"</i>                                                                                     |
|                                    | Judgement | <b>High</b> risk of bias                                                                                                                                                     |
| Blinding of outcome assessment     | Reported  | <i>"The coaches, players, and study therapists were not blinded to group allocation, but the study physicians who assessed the primary outcome were"</i>                     |
|                                    | Judgement | <b>Low</b> risk of bias                                                                                                                                                      |
| Incomplete outcome data            | Reported  | <i>"the dropout frequency was 21% (intervention 16% (23/144 clubs), control 26% (38/147))"</i><br><br><i>"no missing data for analysed clubs"</i>                            |
|                                    | Judgement | <b>Low</b> risk of bias                                                                                                                                                      |
| Selective reporting                | Reported  | <i>Comment: Clinical trials registry study protocol was available and inclusion criteria, intervention, and outcomes corresponded to the reported study of this article</i>  |
|                                    | Judgement | <b>Low</b> risk of bias                                                                                                                                                      |
| Other bias                         | Reported  | <i>Comment: Both adjustment of clustering effects and intention-to-treat were performed.</i>                                                                                 |
|                                    | Judgement | <b>Low</b> risk of bias                                                                                                                                                      |



Wedderkopp et al., Prevention of injuries in young female players in European team handball. A prospective intervention study

|                                    |           |                                                                                                                                                                                                                             |
|------------------------------------|-----------|-----------------------------------------------------------------------------------------------------------------------------------------------------------------------------------------------------------------------------|
| Random sequence generation         | Reported  | <i>"Eleven teams with 11 players were randomised to the intervention group and 11 teams with 126 players to the control group"</i>                                                                                          |
|                                    | Judgement | <b>Low</b> risk of bias                                                                                                                                                                                                     |
| Allocation concealment             | Reported  | <i>Author correspondance: No blinding</i>                                                                                                                                                                                   |
|                                    | Judgement | <b>High</b> risk of bias                                                                                                                                                                                                    |
| Blinding of participants/personnel | Reported  | <i>Author correspondance: No blinding</i>                                                                                                                                                                                   |
|                                    | Judgement | <b>High</b> risk of bias                                                                                                                                                                                                    |
| Blinding of outcome assessment     | Reported  | <i>Author correspondance: No blinding</i>                                                                                                                                                                                   |
|                                    | Judgement | <b>High</b> risk of bias                                                                                                                                                                                                    |
| Incomplete outcome data            | Reported  | <i>Comment: Analysis performed on same no. of players as reported were randomized</i>                                                                                                                                       |
|                                    | Judgement | <b>Low</b> risk of bias                                                                                                                                                                                                     |
| Selective reporting                | Reported  | <i>Comment: A clinical trials registry study protocol wasn't available but the published reports appear to include all expected outcomes, including those that were pre-specified in the method section of this article</i> |
|                                    | Judgement | <b>Low</b> risk of bias                                                                                                                                                                                                     |
| Other bias                         | Reported  | <i>Comment: Intention to treat but no mention of adjustment for cluster effects</i>                                                                                                                                         |
|                                    | Judgement | <b>High</b> risk of bias                                                                                                                                                                                                    |

**eTable1, Quality assessment summary**

Total quality assessment 0-14 scale obtained by assigning studies 1 point for unclear and 2 for low

|               | Sequence generation | Allocation concealment | Participant blinding | Outcome blinding | Incomplete outcome data | Reporting | Other bias | Total quality assessment |
|---------------|---------------------|------------------------|----------------------|------------------|-------------------------|-----------|------------|--------------------------|
| Askling       | Low                 | Unclear                | High                 | Low              | Low                     | Low       | Low        | 11                       |
| Beijsterveldt | Low                 | Unclear                | Low                  | High             | High                    | High      | High       | 5                        |
| Brushoj       | Low                 | Low                    | Low                  | Low              | Low                     | High      | High       | 10                       |
| Coppack       | Low                 | Low                    | Low                  | Low              | Low                     | Low       | Low        | 14                       |
| Eils          | Low                 | High                   | High                 | High             | Low                     | Low       | High       | 6                        |
| Emery 05      | Low                 | Low                    | Low                  | Unclear          | Low                     | Low       | Low        | 13                       |
| Emery 07      | Low                 | Unclear                | Unclear              | Low              | Low                     | Low       | Low        | 12                       |
| Emery 10      | Low                 | High                   | Low                  | Low              | High                    | Low       | Low        | 10                       |
| Gilchrist     | Low                 | Low                    | High                 | Low              | High                    | Low       | High       | 8                        |
| Heidt         | Low                 | Unclear                | High                 | Low              | Low                     | Low       | Low        | 11                       |
| Holmich       | Low                 | Low                    | Low                  | High             | High                    | High      | High       | 6                        |
| Jamtvedt      | Low                 | Low                    | High                 | High             | Low                     | Low       | High       | 8                        |
| LaBella       | Low                 | High                   | High                 | Low              | Low                     | High      | High       | 6                        |
| Longo         | Low                 | Low                    | High                 | Low              | Low                     | Low       | High       | 10                       |
| McGuine       | Low                 | Unclear                | High                 | High             | Low                     | Low       | High       | 7                        |
| Olsen         | Low                 | Low                    | High                 | Low              | Low                     | Low       | Low        | 12                       |
| Pasanen       | Low                 | Low                    | High                 | Low              | Low                     | Low       | Low        | 12                       |
| Petersen      | Low                 | Low                    | High                 | High             | Low                     | Low       | Low        | 10                       |
| Pope 00       | Low                 | Low                    | High                 | Low              | Low                     | Low       | High       | 10                       |
| Pope 98       | Low                 | Unclear                | Low                  | Unclear          | Low                     | Low       | High       | 10                       |
| Soderman      | Low                 | Unclear                | Unclear              | Unclear          | High                    | Low       | High       | 7                        |
| Soligard      | Low                 | Low                    | High                 | Low              | Low                     | Low       | Low        | 12                       |
| Steffen       | Low                 | Low                    | High                 | Low              | Low                     | Low       | Low        | 12                       |
| Walden        | Low                 | Low                    | High                 | Low              | Low                     | Low       | Low        | 12                       |

|            |     |      |      |      |     |     |      |   |
|------------|-----|------|------|------|-----|-----|------|---|
| Wedderkopp | Low | High | High | High | Low | Low | High | 6 |
|------------|-----|------|------|------|-----|-----|------|---|

**eFigure2, Quality assessment summary figure**

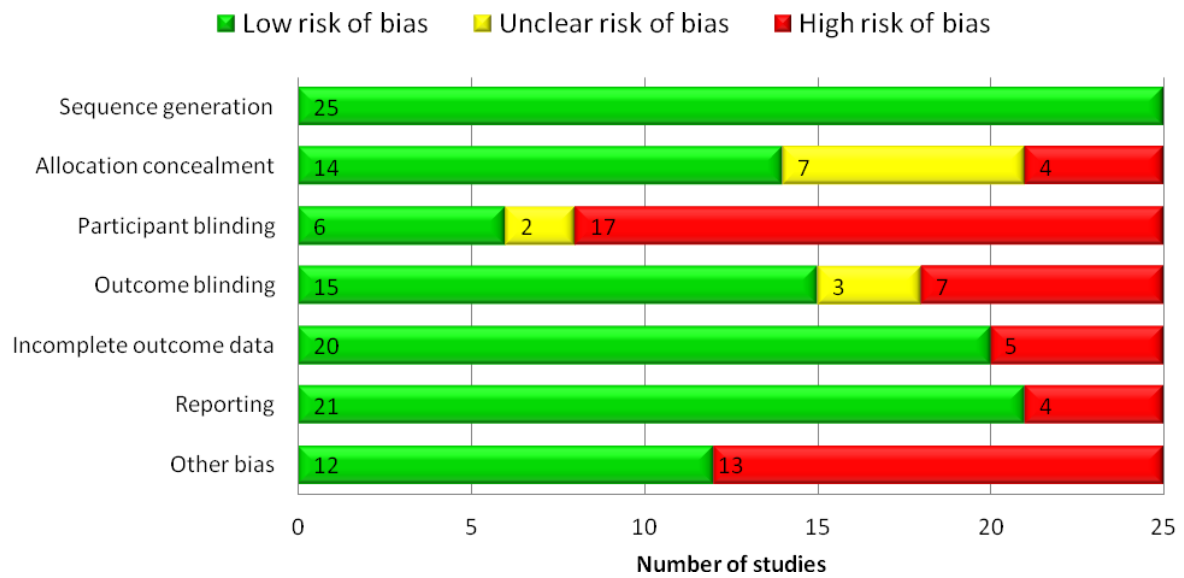



**eTable2, Characteristics of included studies**

| Source/<br>location                                    | Intervention                                                                                                                                                                                                                                                                                                                                                                                    | Population                                                                                                                                                    | Study<br>completion                                                                                                                                                                                                                                                                  | Follow-up                                                                                                   | Outcome                                                                                                                               | Primary<br>outcome                                                                                                                                                                                   | Remarks                                                                                                                                                                                                                                                            |
|--------------------------------------------------------|-------------------------------------------------------------------------------------------------------------------------------------------------------------------------------------------------------------------------------------------------------------------------------------------------------------------------------------------------------------------------------------------------|---------------------------------------------------------------------------------------------------------------------------------------------------------------|--------------------------------------------------------------------------------------------------------------------------------------------------------------------------------------------------------------------------------------------------------------------------------------|-------------------------------------------------------------------------------------------------------------|---------------------------------------------------------------------------------------------------------------------------------------|------------------------------------------------------------------------------------------------------------------------------------------------------------------------------------------------------|--------------------------------------------------------------------------------------------------------------------------------------------------------------------------------------------------------------------------------------------------------------------|
| Askling et<br>al.<br><br>Sweden<br><br>2003            | <ul style="list-style-type: none"> <li>- 10-week (16 sessions) preseason hamstring concentric/eccentric strength training.</li> <li>- Performed additional to standardized warm-up programme also performed by controls.</li> </ul>                                                                                                                                                             | <ul style="list-style-type: none"> <li>- 30 elite, male soccer players, except goalkeepers, in two teams from the Swedish premier-league division.</li> </ul> | <ul style="list-style-type: none"> <li>- 15 individuals in intervention group with a distribution of eight and seven subjects, from each team respectively.</li> <li>- 15 controls with seven individuals from one team and eight from the other.</li> <li>- No attrition</li> </ul> | <ul style="list-style-type: none"> <li>- Ten weeks preconditioning + one season of eight months.</li> </ul> | <ul style="list-style-type: none"> <li>- 3 injuries in intervention group.</li> <li>- 10 injuries in control group.</li> </ul>        | <ul style="list-style-type: none"> <li>- Hamstring injury: Pain by use/palpation + time loss.</li> <li>- Evaluation by therapist and physician.</li> <li>- Injured players were excluded.</li> </ul> | <ul style="list-style-type: none"> <li>- True individual-randomized study, but potential contamination problems could exist</li> <li>- Intention-to-treat analysis.</li> <li>- All players reported having completed all sessions.</li> </ul>                      |
| Beijsterveldt<br>et al.<br><br>Netherlands<br><br>2013 | <ul style="list-style-type: none"> <li>- 10-15min with ten exercises focusing on core stability, eccentric training of the thighs, proprioception training, dynamic stabilization, and plyometrics with straight leg alignment.</li> <li>- 5 week pre-season familiarisation and full implementation by the start of the season.</li> <li>- Control group did the practice as usual.</li> </ul> | <ul style="list-style-type: none"> <li>- 487 male amateur players, aged 18-40 years.</li> </ul>                                                               | <ul style="list-style-type: none"> <li>- 223 players in eleven intervention teams.</li> <li>- 233 players in twelve control teams.</li> <li>- Dropout of one team (21 players) plus 18 individuals in the intervention group and 13 from control group.</li> </ul>                   | <ul style="list-style-type: none"> <li>- One season of nine months.</li> </ul>                              | <ul style="list-style-type: none"> <li>- 135 injuries in intervention group.</li> <li>- 139 injuries in the control group.</li> </ul> | <ul style="list-style-type: none"> <li>- All-injury: F-MARC consensus statement definition</li> <li>- Team paramedic or sports trainer recorded injuries.</li> </ul>                                 | <ul style="list-style-type: none"> <li>- Intention-to-treat.</li> <li>- Sample size calculation based on inflation factor estimate but no report of actual cluster adjustments in either study protocol or published report.</li> <li>- 73% compliance.</li> </ul> |

**eTable2, Characteristics of included studies (continued)**

| Source/<br>location                                    | Intervention                                                                                                                                                                                                                                                                                                                           | Population                                                                                                                      | Study<br>completion                                                                                                            | Follow-<br>up          | Outcome                                                                                                              | Primary outcome                                                                                                                                                                                                                                                             | Remarks                                                                                                                                                                                                                                                                       |
|--------------------------------------------------------|----------------------------------------------------------------------------------------------------------------------------------------------------------------------------------------------------------------------------------------------------------------------------------------------------------------------------------------|---------------------------------------------------------------------------------------------------------------------------------|--------------------------------------------------------------------------------------------------------------------------------|------------------------|----------------------------------------------------------------------------------------------------------------------|-----------------------------------------------------------------------------------------------------------------------------------------------------------------------------------------------------------------------------------------------------------------------------|-------------------------------------------------------------------------------------------------------------------------------------------------------------------------------------------------------------------------------------------------------------------------------|
| Brushoj<br>et al.<br><br>Denmark<br><br>2008           | <p>- 12-week program (three sessions, 15min each, per week) concurrent with start of basic military training. One session composed two strength exercises, three stabilization/ coordination exercises, and one stretching exercise.</p> <p>- Controls did placebo core/upper body exercises with stretch of the pectoral muscles.</p> | <p>- 1020 conscripts, aged 19-26.</p>                                                                                           | <p>- 487 individuals in twelve intervention platoons – attrition of 20</p> <p>- 490 in twelve control teams - attrition 23</p> | <p>- Twelve weeks.</p> | <p>- 50 primary outcome injuries in prevention group.</p> <p>- 48 outcome injuries in control group.</p>             | <p>- Knee overuse injury: Pain + unrelated to trauma + specific criteria.</p> <p>- Medical officer and doctor.</p> <p>- Injuries within last month were excluded.</p> <p>- Repeated outcomes not taken into account.</p> <p>- Secondary: Total lower extremity injuries</p> | <p>- 75% training compliance.</p> <p>- True individualized randomization</p> <p>- No intention-to-treat analysis.</p> <p>- True blinding have likely been achieved.</p> <p>- Concurrent training intervention in high risk period for overuse injuries may be detrimental</p> |
| Coppack<br>et al.<br><br>United<br>kingdom<br><br>2011 | <p>- 14 week program concurrent with military training. Seven training lessons/week with four strength exercises + four stretching exercises per training.</p> <p>- Control performed syllabus military warm-up and warm-down for parts of the body irrelevant for anterior knee pain.</p>                                             | <p>- 44 male and female troops (clusters) with 1502 recruits. Aged 17-30y.</p> <p>- 100% of eligible recruits participated.</p> | <p>- 759 individuals in 21 intervention troops.</p> <p>- 743 in 23 control troops.</p> <p>- No attrition.</p>                  | <p>- 14 weeks</p>      | <p>- 10 injuries in intervention group.</p> <p>- 36 injuries in control group.</p> <p>- Cox HR 0,25 (0,13-0,48).</p> | <p>- Overuse anterior knee pain injury: Pain criteria and other knee injuries excludable.</p> <p>- Military medical center and physiotherapist.</p> <p>- Recruits with signs or symptoms of pathologic conditions of the leg</p>                                            | <p>- Study suspended early because of military operational commitments.</p> <p>- Within-cluster correlation was accounted for.</p> <p>- Mean individual compliance rate for the 2 programs was 91%.</p> <p>- Intention-to-treat</p>                                           |

|  |  |  |  |  |  |                                                                              |           |
|--|--|--|--|--|--|------------------------------------------------------------------------------|-----------|
|  |  |  |  |  |  | <p>were excluded.</p> <p>- Secondary: Total, acute, and overuse injuries</p> | analysis. |
|--|--|--|--|--|--|------------------------------------------------------------------------------|-----------|

**eTable2, Characteristics of included studies (continued)**

| Source/<br>location                    | Intervention                                                                                                                                                                                                           | Population                                                                                                                                                           | Study<br>completion                                                                                                                     | Follow-up                                                                                    | Outcome                                                                                                                                                        | Primary outcome                                                                                                                                                                                                                                                 | Remarks                                                                                                                                                                                                                         |
|----------------------------------------|------------------------------------------------------------------------------------------------------------------------------------------------------------------------------------------------------------------------|----------------------------------------------------------------------------------------------------------------------------------------------------------------------|-----------------------------------------------------------------------------------------------------------------------------------------|----------------------------------------------------------------------------------------------|----------------------------------------------------------------------------------------------------------------------------------------------------------------|-----------------------------------------------------------------------------------------------------------------------------------------------------------------------------------------------------------------------------------------------------------------|---------------------------------------------------------------------------------------------------------------------------------------------------------------------------------------------------------------------------------|
| Eils et al.<br><br>Germany<br><br>2010 | <ul style="list-style-type: none"> <li>- Six proprioception exercises for 20min once per week concurrent with basketball training.</li> <li>- Controls continued normal workout routine.</li> </ul>                    | <ul style="list-style-type: none"> <li>- 198 basketball players in 35 teams from 7<sup>th</sup> highest to highest league.</li> </ul>                                | <ul style="list-style-type: none"> <li>- 81 individuals in intervention group.</li> <li>- 91 controls.</li> <li>- 35 teams.</li> </ul>  | <ul style="list-style-type: none"> <li>- One season</li> </ul>                               | <ul style="list-style-type: none"> <li>- Seven injuries in intervention group.</li> <li>- 21 injuries in control group.</li> </ul>                             | <ul style="list-style-type: none"> <li>- Ankle injury: time loss.</li> <li>- Coach/ physiotherapist/ player registration by questionnaire, followed by interview in case of injury.</li> <li>- Subjects were free of injuries at the start of study.</li> </ul> | <ul style="list-style-type: none"> <li>- No mention of compliance</li> <li>- No adjustments for clustering effects.</li> <li>- No mention of intention-to-treat.</li> </ul>                                                     |
| Emery et al.<br><br>Canada<br><br>2005 | <ul style="list-style-type: none"> <li>- Proprioception, balance, and core training 20min/day for six weeks and weekly for six more months.</li> <li>- Students in the control group received only testing.</li> </ul> | <ul style="list-style-type: none"> <li>- 127 students from 10 high schools, aged 14-19.</li> <li>- 76% of eligible participants consented to participate.</li> </ul> | <ul style="list-style-type: none"> <li>- 60 students in 5 intervention schools.</li> <li>- 54 students in 5 control schools.</li> </ul> | <ul style="list-style-type: none"> <li>- Six weeks plus six months.</li> </ul>               | <ul style="list-style-type: none"> <li>- 2 injuries in intervention group.</li> <li>- 10 injuries in control group.</li> <li>- RR 0,20 (0,05-0,88).</li> </ul> | <ul style="list-style-type: none"> <li>- All injuries: Medical attention and/or time loss.</li> <li>- Physiotherapist</li> <li>- Injuries within last 6 weeks prior to the study were excluded.</li> </ul>                                                      | <ul style="list-style-type: none"> <li>- Intention-to-treat analysis.</li> <li>- Adjusted for clustering effects.</li> <li>- Collected data on compliance was low (43,3%) but actual training compliance is unknown.</li> </ul> |
| Emery et al.<br><br>Canada<br><br>2010 | <ul style="list-style-type: none"> <li>- 5min warm-up + 10min strength, stretch, balance warm-up substitution + additional 15min wobble board.</li> <li>- Controls 15min</li> </ul>                                    | <ul style="list-style-type: none"> <li>- 885 soccer players in 60 clubs. Both boys and girls, aged 13-18.</li> <li>- 73% of eligible teams were</li> </ul>           | <ul style="list-style-type: none"> <li>- 380 players in 32 intervention teams.</li> <li>- 364 players in 28 control teams.</li> </ul>   | <ul style="list-style-type: none"> <li>- One year follow-up, season was 20 weeks.</li> </ul> | <ul style="list-style-type: none"> <li>- 50 injuries in training group.</li> <li>- 79 injuries in control group.</li> <li>- RR 0,62</li> </ul>                 | <ul style="list-style-type: none"> <li>- All injuries: Medical attention and/or time loss.</li> <li>- Physiotherapist or athletic therapist.</li> <li>- Injuries within 6</li> </ul>                                                                            | <ul style="list-style-type: none"> <li>- Intention to treat analysis used.</li> <li>- Adjusted for clustering.</li> <li>- Teams completing exposure data performed all</li> </ul>                                               |

|  |                   |           |  |  |              |                                                                     |                                                      |
|--|-------------------|-----------|--|--|--------------|---------------------------------------------------------------------|------------------------------------------------------|
|  | standart warm-up. | enrolled. |  |  | (0,39-0,99). | weeks were excluded.<br>Secondary outcome:<br>Total acute injuries. | intervention warm-ups but reporting was poor (<15%). |
|--|-------------------|-----------|--|--|--------------|---------------------------------------------------------------------|------------------------------------------------------|

**eTable2, Characteristics of included studies (continued)**

| Source/<br>location                             | Intervention                                                                                                                                                                                                                           | Population                                                                                                                  | Study<br>completion                                                                                                                               | Follow-up                                                                                    | Outcome                                                                                                                                                        | Primary outcome                                                                                                                                                                                                                                                          | Remarks                                                                                                                                                                                              |
|-------------------------------------------------|----------------------------------------------------------------------------------------------------------------------------------------------------------------------------------------------------------------------------------------|-----------------------------------------------------------------------------------------------------------------------------|---------------------------------------------------------------------------------------------------------------------------------------------------|----------------------------------------------------------------------------------------------|----------------------------------------------------------------------------------------------------------------------------------------------------------------|--------------------------------------------------------------------------------------------------------------------------------------------------------------------------------------------------------------------------------------------------------------------------|------------------------------------------------------------------------------------------------------------------------------------------------------------------------------------------------------|
| Emery et al.<br><br>Canada<br><br>2007          | <ul style="list-style-type: none"> <li>- 5min sport-specific balance training and 20min wobble board additional to control warm-up.</li> <li>- Control group performed "current standart practice" warm-up five times/week.</li> </ul> | <ul style="list-style-type: none"> <li>- 931 male and female high school basketball players, 12-18y in 89 teams.</li> </ul> | <ul style="list-style-type: none"> <li>- 494 players in 47 intervention teams.</li> <li>- 426 players in 41 control teams.</li> </ul>             | <ul style="list-style-type: none"> <li>- One year follow-up. Season was 18 weeks.</li> </ul> | <ul style="list-style-type: none"> <li>- 130 injuries in intervention group</li> <li>- 141 injuries in control group</li> <li>- RR 0,8 (0,57-1,11).</li> </ul> | <ul style="list-style-type: none"> <li>- All injuries: Medical attention and/or time loss</li> <li>- Injury surveillance system from Canadian Intercollegiate Sports Injury Registry (CISIR) and therapist.</li> <li>- Injuries within 6 weeks were excluded.</li> </ul> | <ul style="list-style-type: none"> <li>- Self-recorded wobble-board compliance 60,3%.</li> <li>- Analysed by intention-to-treat.</li> <li>- Adjusted for cluster effect.</li> </ul>                  |
| Gilchrist et al.<br><br>Switzerland<br><br>2008 | <ul style="list-style-type: none"> <li>- Warm-up, stretch, strength, plyometric, and sport-specific agility three times per week consisting of 3-5 exercises for each discipline.</li> <li>- Controls normal warm-up.</li> </ul>       | <ul style="list-style-type: none"> <li>- Female collegiate soccer players in 75 teams.</li> </ul>                           | <ul style="list-style-type: none"> <li>- 26 intervention teams with 583 individuals.</li> <li>- Control 35 teams with 852 individuals.</li> </ul> | <ul style="list-style-type: none"> <li>- One season of twelve weeks.</li> </ul>              | <ul style="list-style-type: none"> <li>- 2 injuries in intervention group.</li> <li>- 10 injuries in control group.</li> </ul>                                 | <ul style="list-style-type: none"> <li>- Noncontact ACL injury: time loss.</li> <li>- Athletic trainers, confirmed by either MR, arthroscopy, or visualization at the time of repair.</li> <li>- Previous injuries were included.</li> </ul>                             | <ul style="list-style-type: none"> <li>- As-treated analysis.</li> <li>- No adjustments for clustering effects.</li> <li>- Average compliance with training regime was 26 times per team.</li> </ul> |
| Heidt et al.<br><br>USA                         | <ul style="list-style-type: none"> <li>- 20 individualized preseason conditioning sessions for seven weeks. Two sessions per week were sport-specific cardiovascular conditioning</li> </ul>                                           | <ul style="list-style-type: none"> <li>- 300 female high school soccer players, 14-18y.</li> </ul>                          | <ul style="list-style-type: none"> <li>- 42 players in intervention group.</li> <li>- 258</li> </ul>                                              | <ul style="list-style-type: none"> <li>- One year, including two separate</li> </ul>         | <ul style="list-style-type: none"> <li>- 6 first-time injuries in 42 athletes of the intervention</li> </ul>                                                   | <ul style="list-style-type: none"> <li>- All-injury: time loss.</li> <li>- School athletic</li> </ul>                                                                                                                                                                    | <ul style="list-style-type: none"> <li>- Intention-to-treat analysis.</li> <li>- True individual-</li> </ul>                                                                                         |

|      |                                                                                                                                                                                                                                                                                                                 |  |           |          |                                                                                                                                |                                                                                                       |                                                                                                                                                               |
|------|-----------------------------------------------------------------------------------------------------------------------------------------------------------------------------------------------------------------------------------------------------------------------------------------------------------------|--|-----------|----------|--------------------------------------------------------------------------------------------------------------------------------|-------------------------------------------------------------------------------------------------------|---------------------------------------------------------------------------------------------------------------------------------------------------------------|
| 2000 | <p>exercises with increasingly inclining treadmill to enforce forceful knee drive. One plyometric session per week.</p> <ul style="list-style-type: none"> <li>- Sport cord drills, strength training, and flexibility training mentioned but not described.</li> <li>- Control group not described.</li> </ul> |  | controls. | seasons. | <p>group.</p> <ul style="list-style-type: none"> <li>- 87 first-time injuries in 258 athletes in the control group.</li> </ul> | <p>trainers.</p> <ul style="list-style-type: none"> <li>- No mention of previous injuries.</li> </ul> | <p>allocation to groups.</p> <ul style="list-style-type: none"> <li>- No mention of player recruitment.</li> <li>- No mention of compliance rates.</li> </ul> |
|------|-----------------------------------------------------------------------------------------------------------------------------------------------------------------------------------------------------------------------------------------------------------------------------------------------------------------|--|-----------|----------|--------------------------------------------------------------------------------------------------------------------------------|-------------------------------------------------------------------------------------------------------|---------------------------------------------------------------------------------------------------------------------------------------------------------------|

**eTable2, Characteristics of included studies (continued)**

| <b>Source/<br/>location</b>                                | <b>Intervention</b>                                                                                                                                                                                                                                                                                                                                                                                  | <b>Population</b>                                                                                                                                  | <b>Study<br/>completion</b>                                                                                                                                                                                                                | <b>Follow-<br/>up</b> | <b>Outcome</b>                                                                                                                                                                            | <b>Primary<br/>outcome</b>                                                                                                                                                                        | <b>Remarks</b>                                                                                                                                                                                                                                                                                                               |
|------------------------------------------------------------|------------------------------------------------------------------------------------------------------------------------------------------------------------------------------------------------------------------------------------------------------------------------------------------------------------------------------------------------------------------------------------------------------|----------------------------------------------------------------------------------------------------------------------------------------------------|--------------------------------------------------------------------------------------------------------------------------------------------------------------------------------------------------------------------------------------------|-----------------------|-------------------------------------------------------------------------------------------------------------------------------------------------------------------------------------------|---------------------------------------------------------------------------------------------------------------------------------------------------------------------------------------------------|------------------------------------------------------------------------------------------------------------------------------------------------------------------------------------------------------------------------------------------------------------------------------------------------------------------------------|
| Holmich<br>et al.<br><br>Denmark<br><br>2010               | <ul style="list-style-type: none"> <li>- Sit-ups, one-leg coordination, iliopsoas stretching, and three concentric, eccentric, and isometric adduction exercises for 13min as integrated part of warm-up.</li> <li>- Control group performed traditional warm-up</li> </ul>                                                                                                                          | <ul style="list-style-type: none"> <li>- Amateur football players, 2-5th level.</li> <li>- 46% of invited teams accepted participation.</li> </ul> | <ul style="list-style-type: none"> <li>- 477 players in 22 intervention clubs.</li> <li>- 430 players in 22 control clubs</li> <li>- 12 + 11 clubs withdrew immediately after randomization and further 5 + 6 during the study.</li> </ul> | - 42 weeks.           | <ul style="list-style-type: none"> <li>- Corresponding author reported 23 injuries in intervention group and 30 injuries in control group.</li> <li>- Cox HR 0,69 (0,40-1,19).</li> </ul> | <ul style="list-style-type: none"> <li>- Groin injury: any physical complaint or medical attention.</li> <li>- Physiotherapist and coach.</li> <li>- Previous groin injuries included.</li> </ul> | <ul style="list-style-type: none"> <li>- 11 year report delay due to high number of competing tasks.</li> <li>- Adjusted for intracluster estimate.</li> <li>- 93% of players presented with full data.</li> <li>- The intention-to-treat analysis were claimed not to show any differences but weren't reported.</li> </ul> |
| Jamtvedt<br>et al.<br><br>Norway/<br>Australia<br><br>2010 | <ul style="list-style-type: none"> <li>- Seven muscle groups in the lower limb and trunk were stretched for at least 14min before and after vigorous activity. Instructions were accessible at website and subjects were asked to stretch for at least 30 sec and until felt strong but not painful stretch.</li> <li>- Controls were asked not to stretch any lower limb or trunk muscle</li> </ul> | 2377 participants worldwide, >18 years, English/ Norwegian speaking, vigorous activity $\geq 1$ day(s) a week, and internet access.                | <ul style="list-style-type: none"> <li>- 1079 participants in intervention group.</li> <li>- 1046 controls.</li> </ul>                                                                                                                     | - Twelve weeks.       | <ul style="list-style-type: none"> <li>- 339 injuries in intervention group and 348 in the control group.</li> <li>- Cox HR 0,97 (0,84-1,13).</li> </ul>                                  | <ul style="list-style-type: none"> <li>- Lower limb and trunk injuries: internet-based self-reporting.</li> <li>- Current injuries were excluded.</li> </ul>                                      | <ul style="list-style-type: none"> <li>- Entirely internet-based study design.</li> <li>- Intention to treat analysis.</li> <li>- According to self-reports 38,4% and 43,9% of the intervention group complied fully or almost fully to target frequency and duration, respectively.</li> </ul>                              |

|  |        |  |  |  |  |  |  |
|--|--------|--|--|--|--|--|--|
|  | groups |  |  |  |  |  |  |
|--|--------|--|--|--|--|--|--|

**eTable2, Characteristics of included studies (continued)**

| Source/<br>location                           | Intervention                                                                                                                                                                                                                                                                                                                                                    | Population                                                                                                                                                               | Study<br>completion                                                                                                                                                           | Follow-up                                                                   | Outcome                                                                                                                             | Primary<br>outcome                                                                                                                                                                                                                       | Remarks                                                                                                                                                                                                                                                         |
|-----------------------------------------------|-----------------------------------------------------------------------------------------------------------------------------------------------------------------------------------------------------------------------------------------------------------------------------------------------------------------------------------------------------------------|--------------------------------------------------------------------------------------------------------------------------------------------------------------------------|-------------------------------------------------------------------------------------------------------------------------------------------------------------------------------|-----------------------------------------------------------------------------|-------------------------------------------------------------------------------------------------------------------------------------|------------------------------------------------------------------------------------------------------------------------------------------------------------------------------------------------------------------------------------------|-----------------------------------------------------------------------------------------------------------------------------------------------------------------------------------------------------------------------------------------------------------------|
| LaBella et al.<br><br>USA<br><br>2011         | <ul style="list-style-type: none"> <li>- 20min full strength, plyometric, balance, and agility warm-up program before practice and dynamic motion warm-up before games.</li> <li>- Controls did usual warm-up.</li> </ul>                                                                                                                                       | <ul style="list-style-type: none"> <li>- 95 coaches of 111 teams with 1558 female athletes in a mixed-ethnicity, pre-dominantly low-income, urban population.</li> </ul> | <ul style="list-style-type: none"> <li>- 45 intervention coaches (53 teams) with 737 athletes.</li> <li>- 45 control coaches (53 teams) coaches with 755 athletes.</li> </ul> | <ul style="list-style-type: none"> <li>- One season.</li> </ul>             | <ul style="list-style-type: none"> <li>- 50 injuries in intervention group.</li> <li>- 96 injuries in the control group.</li> </ul> | <ul style="list-style-type: none"> <li>- Lower extremity injury: Time loss.</li> <li>- Physical therapy/ medicine/ advanced practice nursing students with diagnosis confirmation.</li> <li>- No specific exclusion criteria.</li> </ul> | <ul style="list-style-type: none"> <li>- Self-reported compliance to prescribed warm-up was 80% but most coaches did not use all the prescribed exercises.</li> <li>- No adjustments for clustering effects.</li> <li>- Intention-to-treat analysis.</li> </ul> |
| Longo et al.<br><br>Italy/England<br><br>2012 | <ul style="list-style-type: none"> <li>- 20min, three component warm-up program, 1: Slow running exercises with stretch/controlled partner contact, 2: strength/balance/jump exercises, 3: speed running with basketball-specific movements. Full warm-up before each training and running exercises before matches</li> <li>- Control usual warm-up</li> </ul> | <ul style="list-style-type: none"> <li>- 11 teams composed of 121 players from one club. Male players from U12, league to 3rd national league.</li> </ul>                | <ul style="list-style-type: none"> <li>- Seven intervention teams with 80 players.</li> <li>- Four control teams with 41 players.</li> <li>- No attrition.</li> </ul>         | <ul style="list-style-type: none"> <li>- Nine months.</li> </ul>            | <ul style="list-style-type: none"> <li>- 14 injuries in intervention group.</li> <li>- 17 injuries in control group.</li> </ul>     | <ul style="list-style-type: none"> <li>- All-injury: No mention of diagnosis criteria</li> <li>- Team medical staff and orthopaedic research center.</li> <li>- No mention of previous injuries.</li> </ul>                              | <ul style="list-style-type: none"> <li>- Analyzed by intention-to-treat.</li> <li>- Authors report 100% compliance.</li> <li>- No adjustments for clustering effects.</li> </ul>                                                                                |
| McGuine et                                    | <ul style="list-style-type: none"> <li>- Four progressive phases with five sessions per week. Balance</li> </ul>                                                                                                                                                                                                                                                | <ul style="list-style-type: none"> <li>- 765 adolescent</li> </ul>                                                                                                       | <ul style="list-style-type: none"> <li>- 27 intervention</li> </ul>                                                                                                           | <ul style="list-style-type: none"> <li>- Four weeks conditioning</li> </ul> | <ul style="list-style-type: none"> <li>- 23 injuries in</li> </ul>                                                                  | <ul style="list-style-type: none"> <li>- Ankle sprain: disruption of</li> </ul>                                                                                                                                                          | <ul style="list-style-type: none"> <li>- Intention-to-</li> </ul>                                                                                                                                                                                               |

|                    |                                                                                                                                                           |                                                                                        |                                                                                        |                               |                                                                                              |                                                                                                                           |                                                                                                            |
|--------------------|-----------------------------------------------------------------------------------------------------------------------------------------------------------|----------------------------------------------------------------------------------------|----------------------------------------------------------------------------------------|-------------------------------|----------------------------------------------------------------------------------------------|---------------------------------------------------------------------------------------------------------------------------|------------------------------------------------------------------------------------------------------------|
| al.<br>USA<br>2006 | board preconditioning in four weeks followed by a maintenance phase during the season, three sessions per week<br><br>- Controls did normal conditioning. | basketball and soccer players, 523 girls and 242 boys, high schools from twelve areas. | teams consisting of 373 participants.<br><br>- 28 control teams with 392 participants. | plus one season of follow-up. | intervention group.<br><br>- 39 injuries in control group.<br><br>- Cox RR 0.56 (0.33-0.95). | ligaments + time loss.<br><br>- Athletic trainer assessment.<br><br>- Previous injuries (24%) were included in the study. | treat analysis.<br><br>- 9% were defined as non-compliant.<br><br>- No adjustments for clustering effects. |
|--------------------|-----------------------------------------------------------------------------------------------------------------------------------------------------------|----------------------------------------------------------------------------------------|----------------------------------------------------------------------------------------|-------------------------------|----------------------------------------------------------------------------------------------|---------------------------------------------------------------------------------------------------------------------------|------------------------------------------------------------------------------------------------------------|

**eTable2, Characteristics of included studies (continued)**

| Source/<br>location                       | Intervention                                                                                                                                                                                                                                                                                                                 | Population                                                                                                                                                     | Study<br>completion                                                               | Follow-<br>up                  | Outcome                                                                                                               | Primary outcome                                                                                                                                                                 | Remarks                                                                                                                                               |
|-------------------------------------------|------------------------------------------------------------------------------------------------------------------------------------------------------------------------------------------------------------------------------------------------------------------------------------------------------------------------------|----------------------------------------------------------------------------------------------------------------------------------------------------------------|-----------------------------------------------------------------------------------|--------------------------------|-----------------------------------------------------------------------------------------------------------------------|---------------------------------------------------------------------------------------------------------------------------------------------------------------------------------|-------------------------------------------------------------------------------------------------------------------------------------------------------|
| Olsen et al.<br><br>Norway<br><br>2005    | - 15 consecutive sessions of four exercises for a total of 15-20min every training session and then once a week for the remainder of the season. Comprised of warm-up, technique, balance and strength/power.<br><br>- Controls trained as usual.                                                                            | - 1886, 15-17 year-old, players in 123 handball clubs.<br><br>- 85% of eligible were recruited.                                                                | - 61 intervention clubs of 958 players.<br><br>- 59 control clubs of 879 players. | - One season of eighth months. | - 48 injuries in the intervention group.<br><br>- 81 injuries in the control group.<br><br>- Cox RR 0,53 (0.35-0.81). | - Knee and ankle injury: Time loss.<br><br>- Physiotherapists.<br><br>- No major injuries at inclusion.                                                                         | - Intention-to-treat analysis.<br><br>- Adjusted for clustering effect.<br><br>- 87% compliance to programme.                                         |
| Pasanen et al.<br><br>Finland<br><br>2008 | - 20-30min of running techniques, balance/body control, plyometric, and strength exercises. Players with lower back control difficulties or flexibility limitation were asked to stretch in addition. Two week introduction and thereafter the players were advised to carry out in own time.<br><br>- Control usual warm-up | - 28 teams with 475 female floorball players of elite league, 1 <sup>st</sup> , and 2 <sup>nd</sup> division.<br><br>- 86% of eligible players were recruited. | - 14 intervention teams of 256 players.<br><br>- 14 control teams of 201 players. | - One season of six months.    | - 20 injuries in the intervention group.<br><br>- 52 injuries in the control group.<br><br>- RR 0,34 (0.20-0.57).     | - Non-contact injury: time loss.<br><br>- Study doctor followed up on questionnaire reports.<br><br>- Previous injuries were included and didn't differ between the two groups. | - Intention-to-treat analysis.<br><br>- A mean of 74% of sessions were completed.<br><br>- Cluster adjusted by estimation of intracluster correlation |

|                                            |                                                                                                                                            |                                                                |                                                                                                            |                  |                                                                                                           |                                                                                                                                                                                 |                                                                                                                              |
|--------------------------------------------|--------------------------------------------------------------------------------------------------------------------------------------------|----------------------------------------------------------------|------------------------------------------------------------------------------------------------------------|------------------|-----------------------------------------------------------------------------------------------------------|---------------------------------------------------------------------------------------------------------------------------------------------------------------------------------|------------------------------------------------------------------------------------------------------------------------------|
|                                            |                                                                                                                                            |                                                                |                                                                                                            |                  |                                                                                                           |                                                                                                                                                                                 | coefficients.<br><br>- On average 69% of players attended training.                                                          |
| Petersen et al.<br><br>Denmark<br><br>2011 | - Additional ten week progressive Nordic hamstring exercise and maintenance of three sets once a week.<br><br>- Controls trained as usual. | - 54 men's soccer teams from the five best leagues in Denmark. | - 23 intervention teams with 461 players.<br><br>- 27 control teams with 481 players.<br><br>- No dropout. | - Twelve months. | - 12 injuries in intervention group.<br><br>- 32 injuries in control group.<br><br>- RR 0,41 (0,18-0,93). | - Acute hamstring injury: any physical complaint.<br><br>- Medical staff or physiotherapist.<br><br>- Previous injuries were included and didn't differ between the two groups. | - 91% compliance to intended training.<br><br>- Adjusted for intracluster coefficient.<br><br>- Intention-to-treat analysis. |

**eTable2, Characteristics of included studies (continued)**

| Source/<br>location                      | Intervention                                                                                                                                                      | Population                                | Study<br>completion                                                                                              | Follow-<br>up   | Outcome                                                                                                       | Primary outcome                                                                                                                                                                                                                                                                                                                                                         | Remarks                                                                                                                                                                        |
|------------------------------------------|-------------------------------------------------------------------------------------------------------------------------------------------------------------------|-------------------------------------------|------------------------------------------------------------------------------------------------------------------|-----------------|---------------------------------------------------------------------------------------------------------------|-------------------------------------------------------------------------------------------------------------------------------------------------------------------------------------------------------------------------------------------------------------------------------------------------------------------------------------------------------------------------|--------------------------------------------------------------------------------------------------------------------------------------------------------------------------------|
| Pope et al.<br><br>Australia<br><br>1998 | - Two 20sec stretches for gastrocnemius and soleus before strenuous exercise, on average every second day.<br><br>- Controls stretched wrist flexors and triceps. | - 1093 male recruits between 17-35 years. | - 549 subjects in 26 intervention platoons.<br><br>- 544 subjects in 26 control platoons.<br><br>- No attrition. | - Twelve weeks. | - 23 injuries in intervention group.<br><br>- 25 injuries in control group.<br><br>- Cox HR 0,92 (0,52-1,61). | - Injury definition: >3 days before taking up full duty without symptoms because of tendo-achilles lesion, ankle sprain, stress fracture, periostitis, or anterior tibial compartment pressure syndrome.<br><br>- Reporting to medical assistants or nursing staff and diagnosis by medical officer or research physiotherapists.<br><br>- Excluded if significant pre- | - 96,7% of eligible recruits consented.<br><br>- Analysed by survival analysis.<br><br>- No mention of adjustment for clustering effects.<br><br>- Intention-to-treat as there |

|                                  |                                                                                                                                                                                                                                                          |                                                                                             |                                                                                                                                               |                                                                   |                                                                                                                                                                       |                                                                                                                                                                                                                                                                             |                                                                                                                                                                                                                       |
|----------------------------------|----------------------------------------------------------------------------------------------------------------------------------------------------------------------------------------------------------------------------------------------------------|---------------------------------------------------------------------------------------------|-----------------------------------------------------------------------------------------------------------------------------------------------|-------------------------------------------------------------------|-----------------------------------------------------------------------------------------------------------------------------------------------------------------------|-----------------------------------------------------------------------------------------------------------------------------------------------------------------------------------------------------------------------------------------------------------------------------|-----------------------------------------------------------------------------------------------------------------------------------------------------------------------------------------------------------------------|
|                                  |                                                                                                                                                                                                                                                          |                                                                                             |                                                                                                                                               |                                                                   |                                                                                                                                                                       | existing injury.                                                                                                                                                                                                                                                            | was no dropout.                                                                                                                                                                                                       |
| Pope et al.<br>Australia<br>2000 | <ul style="list-style-type: none"> <li>- 40 sessions in twelve weeks with a 5min program with 20sec stretches interspersed with 4min warm-up. Six muscle groups of the leg were stretched.</li> <li>- Controls didn't stretch during warm-up.</li> </ul> | <ul style="list-style-type: none"> <li>- 1538 male army recruits in 39 platoons.</li> </ul> | <ul style="list-style-type: none"> <li>- 19 intervention platoons of 666 subjects.</li> <li>- 20 control platoons of 702 subjects.</li> </ul> | <ul style="list-style-type: none"> <li>- Twelve weeks.</li> </ul> | <ul style="list-style-type: none"> <li>- 158 injuries in intervention group.</li> <li>- 175 injuries in control group.</li> <li>- Cox HR 0,95 (0,77-1,18).</li> </ul> | <ul style="list-style-type: none"> <li>- Lower-limb injury: &gt;3 days before taking up full duty without symptoms.</li> <li>- Reporting by medical assistants or nursing staff and diagnosis by medical officer.</li> <li>- Significant injuries were excluded.</li> </ul> | <ul style="list-style-type: none"> <li>- Intention-to-treat analysis.</li> <li>- No mention of adjustments for clustering effects.</li> <li>- No analysis of compliance other than reported training days.</li> </ul> |

**eTable2, Characteristics of included studies (continued)**

| Source/<br>location                          | Intervention                                                                                                                                                                                                                                                                                                                                                              | Population                                                                                                                                                      | Study<br>completion                                                                                                                                                                                                        | Follow-<br>up                                                                    | Outcome                                                                                                                                                               | Primary<br>outcome                                                                                                                                                                                                | Remarks                                                                                                                                                                                                                                               |
|----------------------------------------------|---------------------------------------------------------------------------------------------------------------------------------------------------------------------------------------------------------------------------------------------------------------------------------------------------------------------------------------------------------------------------|-----------------------------------------------------------------------------------------------------------------------------------------------------------------|----------------------------------------------------------------------------------------------------------------------------------------------------------------------------------------------------------------------------|----------------------------------------------------------------------------------|-----------------------------------------------------------------------------------------------------------------------------------------------------------------------|-------------------------------------------------------------------------------------------------------------------------------------------------------------------------------------------------------------------|-------------------------------------------------------------------------------------------------------------------------------------------------------------------------------------------------------------------------------------------------------|
| Soderman<br>et al.<br><br>Sweden<br><br>2000 | <ul style="list-style-type: none"> <li>- 10-15min additional balance board exercises consisting of five progressions of difficulty. Each exercise was carried out three times 15sec for each leg. Initially training each day for 30 days and after this three times per week the rest of the season.</li> <li>- No description of control group instructions.</li> </ul> | <ul style="list-style-type: none"> <li>- 221 female soccer players from 13 teams in the 2nd and 3rd Swedish division.</li> </ul>                                | <ul style="list-style-type: none"> <li>- 62 players in seven intervention teams.</li> <li>- Control 78 players in six teams.</li> <li>- 27 individuals who didn't complete more than 35 sessions were excluded.</li> </ul> | <ul style="list-style-type: none"> <li>- One season of seven months.</li> </ul>  | <ul style="list-style-type: none"> <li>- 28 injuries in intervention group.</li> <li>- 31 injuries in control group.</li> <li>- Cox RR 1,24 (0,74-2,06).</li> </ul>   | <ul style="list-style-type: none"> <li>- Lower extremity injury: time loss. Reported by players and coaches and diagnosed by authors.</li> <li>- Recurrent injuries analyzed.</li> </ul>                          | <ul style="list-style-type: none"> <li>- No cluster adjustment.</li> <li>- Not analyzed by intention-to-treat.</li> <li>- Intervention group performed 77% of the planned sessions.</li> <li>- Cox RR of major injuries 10.96 (2.10-57.3).</li> </ul> |
| Soligard et<br>al.<br><br>Norway<br><br>2008 | <ul style="list-style-type: none"> <li>- 8min running exercises, 10min of strength/balance/jump exercises, and 2min of football-specific movements before each training and the running exercises before each match.</li> <li>- Controls performed usual warm-up.</li> </ul>                                                                                              | <ul style="list-style-type: none"> <li>- 2540 female football players in 125 clubs, aged 13-17 years.</li> <li>- 69% of eligible clubs participated.</li> </ul> | <ul style="list-style-type: none"> <li>- 52 intervention clubs with 1055 players.</li> <li>- 41 control clubs with 837 players.</li> </ul>                                                                                 | <ul style="list-style-type: none"> <li>- One season of eighth months.</li> </ul> | <ul style="list-style-type: none"> <li>- 121 injuries in intervention group.</li> <li>- 143 injuries in control group.</li> <li>- Cox RR 0,71 (0,49-1,03).</li> </ul> | <ul style="list-style-type: none"> <li>- Lower extremity injury: time loss.</li> <li>- Physical therapist and medical student.</li> <li>- Unknown whether previous injuries were included in analysis.</li> </ul> | <ul style="list-style-type: none"> <li>- Adjusted by intracluster coefficient.</li> <li>- Intention-to-treat analyses.</li> <li>- 77% compliance.</li> <li>- No injury occurred during the execution of the warm-up programme.</li> </ul>             |

**eTable2, Characteristics of included studies (continued)**

| Source/<br>location                      | Intervention                                                                                                                                                                                                                                                                                                                           | Population                                                                                                              | Study<br>completion                                                                       | Follow-up                                             | Outcome                                                                                                  | Primary<br>outcome                                                                                                                                                          | Remarks                                                                                                                                                                                                                  |
|------------------------------------------|----------------------------------------------------------------------------------------------------------------------------------------------------------------------------------------------------------------------------------------------------------------------------------------------------------------------------------------|-------------------------------------------------------------------------------------------------------------------------|-------------------------------------------------------------------------------------------|-------------------------------------------------------|----------------------------------------------------------------------------------------------------------|-----------------------------------------------------------------------------------------------------------------------------------------------------------------------------|--------------------------------------------------------------------------------------------------------------------------------------------------------------------------------------------------------------------------|
| Steffen et al.<br><br>Norway<br><br>2008 | - 5min jogging followed by ten exercises focusing on core stability, balance, joint stabilization, and eccentric hamstring strength for about 15min. Performed for 15 consecutive sessions and after that, once a week for the rest of the season.<br><br>- Controls trained and warmed-up as usual.                                   | - About 2100 female soccer players in 113 teams from Norwegian U17 league.<br><br>- 72% of eligible clubs participated. | - 1073 players in 58 intervention teams.<br><br>- 947 players in 51 control teams.        | - Two months pre-season + one season of eight months. | - 242 injuries in intervention group.<br><br>- 241 injuries in control group.<br><br>- RR 1,0 (0,8-1,2). | - All-injury: time loss.<br><br>- Physical therapists.<br><br>- Unknown whether previous injuries were included in analysis.                                                | - Intention-to-treat analyses.<br><br>- Adjusted for clustering effects.<br><br>- The program was used at 52% of all trainings for the intervention group and the average attendance for these were 60% for each player. |
| Waldén et al.<br><br>Sweden<br><br>2012  | - 5min low intensity running warm-up and 15min for six neuromuscular exercises program. The six exercises were one legged knee squat, pelvic lift, two legged knee squat, the bench, the lunge, and jump/landing technique two times a week.<br><br>- Controls trained as usual and teams already did injury prevention were excluded. | - 309 clubs with 4564 female soccer players, 12-17 years.<br><br>- 75% of eligible clubs participated.                  | - 121 intervention clubs with 2479 players.<br><br>- 109 control clubs with 2085 players. | - One season of seven months.                         | - Intervention group: 7 injuries.<br><br>- Controls: 14 injuries.<br><br>- Cox RR 0,36 (0,15-0,85).      | - ACL injury: sudden onset time loss.<br><br>- Study therapists and physicians with access to diagnostic imaging.<br><br>- Unknown whether previous injuries were excluded. | - Intention-to-treat analysis.<br><br>- Adjustment for clustering effects performed.<br><br>- No report of compliance.                                                                                                   |
| Wedderkopp et al.                        | - 10-15min of ankle disc exercises and a minimum of two functional activities for all                                                                                                                                                                                                                                                  | - 22 teams with 237 players, aged 16-18                                                                                 | - 11 intervention teams with                                                              | - One season of                                       | - 11 injuries in intervention                                                                            | - All-injury: time loss.                                                                                                                                                    | - Controlled for playing level.                                                                                                                                                                                          |

|                 |                                                                                                   |                              |                                                          |            |                                                                                    |                                                                                        |                                                                                                         |
|-----------------|---------------------------------------------------------------------------------------------------|------------------------------|----------------------------------------------------------|------------|------------------------------------------------------------------------------------|----------------------------------------------------------------------------------------|---------------------------------------------------------------------------------------------------------|
| Denmark<br>1999 | major upper and lower extremity muscle groups.<br><br>- Controls were asked to practice as usual. | years, in three tournaments. | 111 players.<br><br>- 11 control teams with 126 players. | ten months | group.<br><br>- 45 injuries in intervention group.<br><br>- OR 0.17 (0.089-0.324). | - Therapists and physicians.<br><br>- Unknown whether previous injuries were excluded. | - Intention-to-treat analysis was performed.<br><br>- No mention of adjustments for clustering effects. |
|-----------------|---------------------------------------------------------------------------------------------------|------------------------------|----------------------------------------------------------|------------|------------------------------------------------------------------------------------|----------------------------------------------------------------------------------------|---------------------------------------------------------------------------------------------------------|

**eFigure3, Stretch estimate Forest plot**

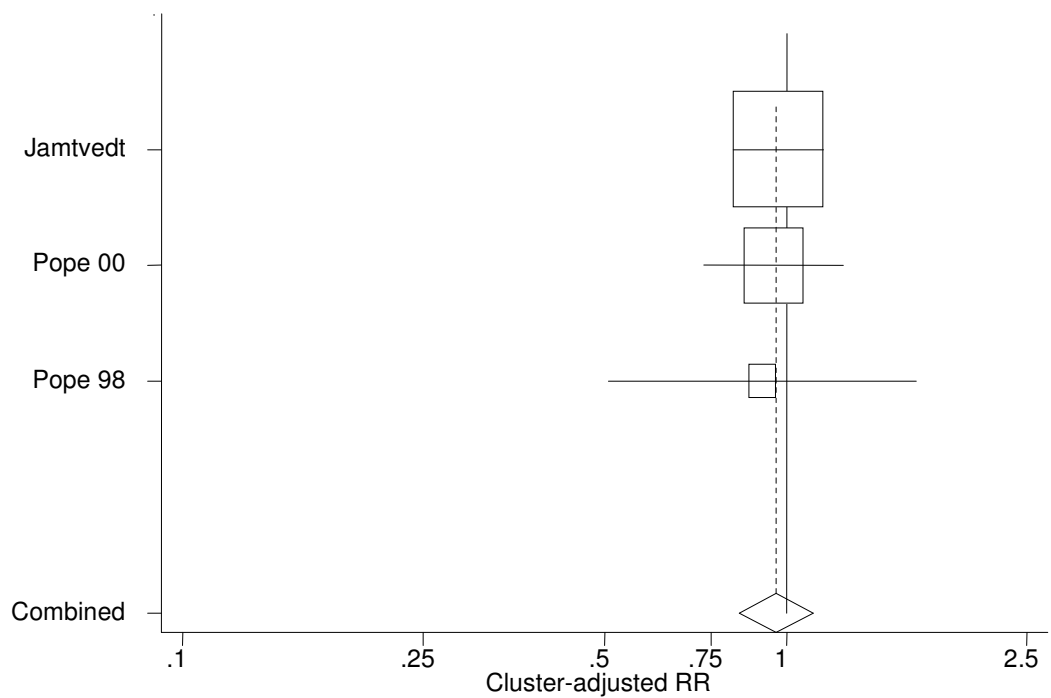

**eFigure4, Proprioception training estimate Forest plot**

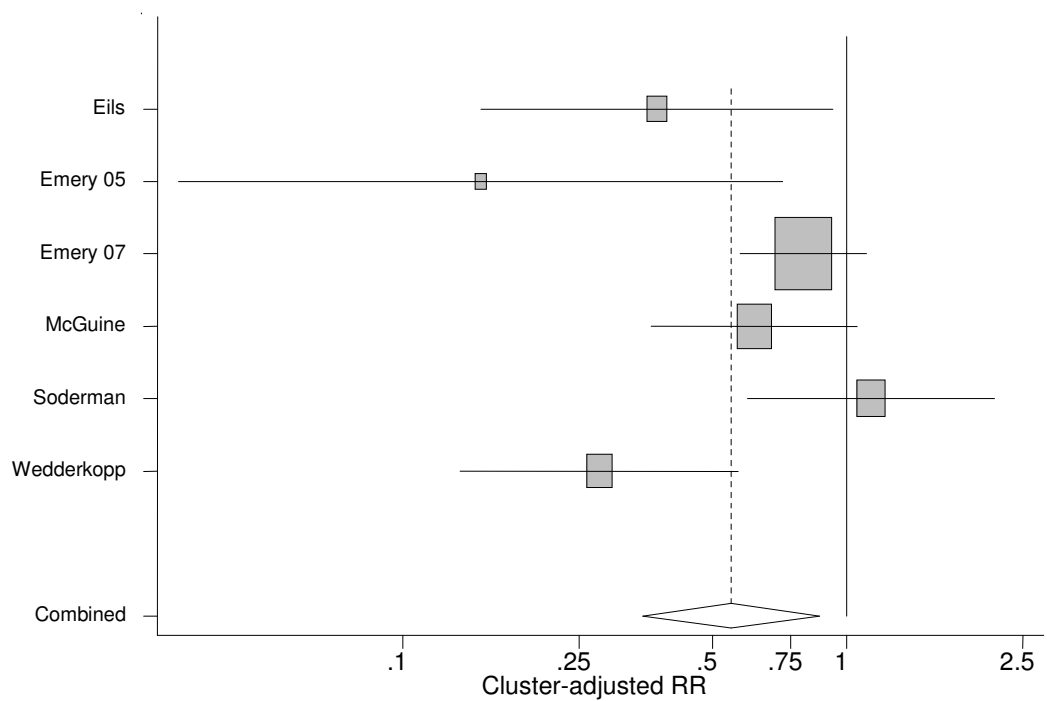

eFigure5, Strength training estimate Forest plot

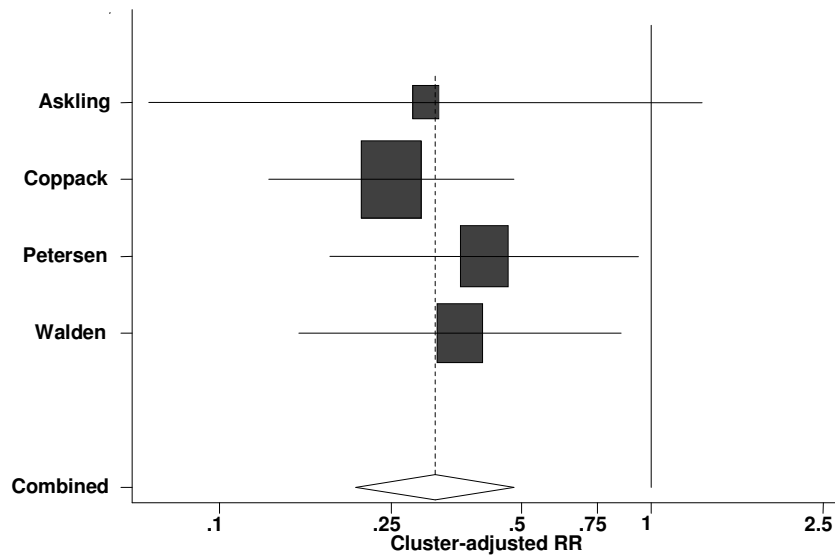

eFigure6, Multiple exposure studies estimate Forest plot

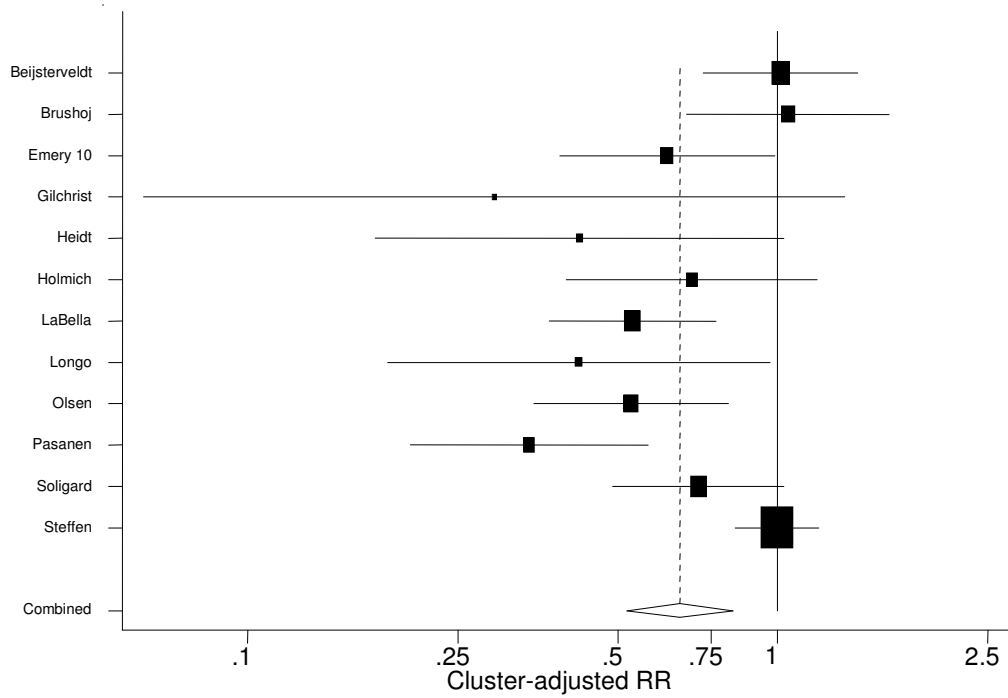

**eFigure7, Modified Galbraith plot**

Regress  $Z/\sqrt{V}$  on  $\sqrt{V}$  where  $Z$  is efficient score and  $V$  is score variance

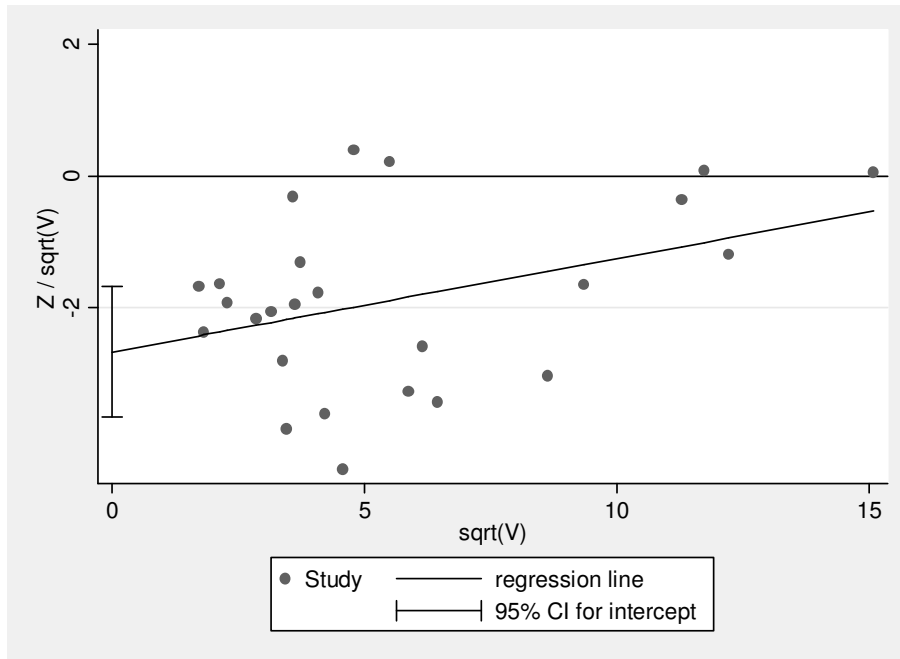

**eTable3, Harbord's tests for the total estimate and subgroups**

| Estimate                | P-value for Harbord's test |
|-------------------------|----------------------------|
| Total estimate          | < 0.001                    |
| Strength training       | 0.440                      |
| Proprioception training | 0.128                      |
| Stretching              | 0.384                      |
| Multi interventions     | 0.012                      |
| Acute outcomes          | 0.129                      |
| Overuse outcomes        | 0.975                      |
